# Supplementary material for: Molecularly-defined macrocycles containing azobenzene main-chain oligomers: modular stepwise synthesis, chain-length and topology-dependent properties
Source: Royal Society of Chemistry journal article supplement (doi:10.1039/c5py01950h), 2016-01-01
Supplement: c5py01950h1.pdf [file c5py01950h1.pdf]

Supporting Information

for

**Molecularly-Defined Macrocycles Containing Azobenzene Main-Chain Oligomers:  
Modular Stepwise Synthesis, Chain-Length and Topology-Dependent Properties**

*Xi Jiang,<sup>a</sup> Jinjie Lu,<sup>a</sup> Feng Zhou,<sup>a</sup> Zhengbiao Zhang,<sup>a</sup> Xiangqiang Pan,<sup>a</sup> Wei Zhang,<sup>a</sup> Yong Wang,<sup>b</sup>  
Nianchen Zhou,<sup>\*a</sup> Xiulin Zhu<sup>\*a</sup>*

<sup>a</sup> State and Local Joint Engineering Laboratory for Novel Functional Polymeric Materials; Jiangsu Key Laboratory of Advanced Functional Polymer Design and Application; Suzhou Key Laboratory of Macromolecular Design and Precision Synthesis; College of Chemistry, Chemical Engineering and Materials Science, Soochow University, Suzhou 215123, China.

<sup>b</sup> Key Laboratory of Organic Synthesis of Jiangsu Province College of Chemistry, Chemical Engineering and Materials Science, Soochow University, Suzhou 215123, P. R. China.

\*Corresponding authors. E-mail: xlzhu@suda.edu.cn; nczhou@suda.edu.cn

## Synthetic procedures

### Synthesis of HAAzo

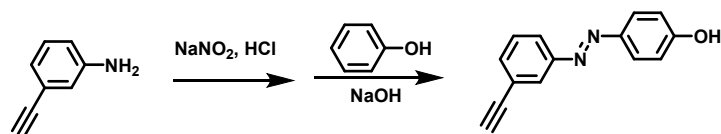

<sup>1</sup>H NMR (CDCl<sub>3</sub>), δ (TMS, ppm): 8.04-7.97 (s, 1H, ArH), 7.94-7.83 (m, 3H, ArH), 7.62-7.52 (d, 1H, ArH), 7.50-7.42 (m, 1H, ArH), 7.00-6.91 (d, 2H, ArH), 5.36-5.27 (s, 1H, ArOH), 3.17-3.10 (s, 1H, ArC≡CH).

### Synthesis of Br-TEG-OH

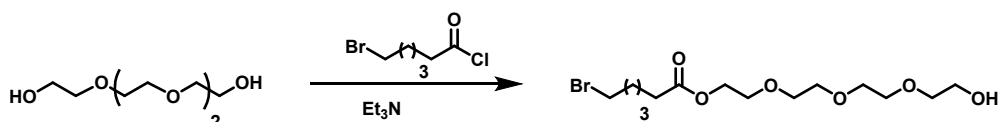

<sup>1</sup>H NMR (300 MHz, CDCl<sub>3</sub>) δ 4.27-4.20 (m, 2H, -COOCH<sub>2</sub>CH<sub>2</sub>-), 3.73 (dd, *J* = 8.8, 4.4 Hz, 4H, -CH<sub>2</sub>CH<sub>2</sub>O-), 3.67 (s, 8H, -OCH<sub>2</sub>CH<sub>2</sub>O-), 3.64-3.59 (m, 2H, -CH<sub>2</sub>OH), 3.54 (t, *J* = 6.6 Hz, 1H, -BrCH<sub>2</sub>-), 3.41 (t, *J* = 6.7 Hz, 1H, -BrCH<sub>2</sub>-), 2.36 (t, *J* = 7.4 Hz, 3H, -CH<sub>2</sub>COO-, -OH), 1.94-1.76 (m, 2H, -CH<sub>2</sub>CH<sub>2</sub>-), 1.73-1.60 (m, 2H, -CH<sub>2</sub>CH<sub>2</sub>-), 1.54-1.41 (m, 2H, -CH<sub>2</sub>CH<sub>2</sub>-).

### Synthesis of Azo-TEG-OH

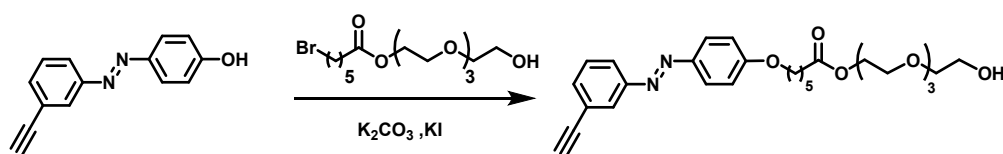

<sup>1</sup>H NMR (300 MHz, CDCl<sub>3</sub>) δ 8.00 (s, 1H, phenyl), 7.89 (d, *J* = 13.9, 8.5 Hz, 3H, phenyl), 7.55 (d, *J* = 7.6 Hz, 1H, phenyl), 7.45 (t, *J* = 7.8 Hz, 1H, phenyl), 7.00 (d, *J* = 9.0 Hz, 2H, phenyl), 4.28-4.22 (m, 2H, -OCOCH<sub>2</sub>-), 4.05 (t, *J* = 6.4 Hz, 2H, -OCH<sub>2</sub>CH<sub>2</sub>-), 3.72 (dd, *J* = 5.1, 3.8 Hz, 4H, -OCH<sub>2</sub>CH<sub>2</sub>O-), 3.66 (s, 9H, -OCH<sub>2</sub>CH<sub>2</sub>O-), 3.63-3.57 (m, 2H, -CH<sub>2</sub>OH), 3.13 (s, 1H, -C≡CH), 2.40 (t, *J* = 7.4 Hz, 2H, -CH<sub>2</sub>COO-), 1.90-1.78 (m, 2H, -CH<sub>2</sub>CH<sub>2</sub>-), 1.71 (dt, *J* = 12.7, 6.5 Hz, 2H, -CH<sub>2</sub>CH<sub>2</sub>-), 1.62-1.46 (m, 2H), 1.43 (s, 2H, -CH<sub>2</sub>CH<sub>2</sub>-).

### Synthesis of (Azo-TEG)<sub>1</sub>-Br

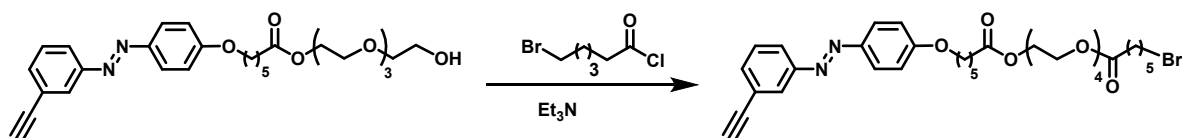

<sup>1</sup>H NMR (300 MHz, CDCl<sub>3</sub>) δ 8.10-7.77 (m, 4H, phenyl), 7.49 (dt, *J* = 15.5, 7.7 Hz, 2H, phenyl), 7.00 (d, *J* = 9.0 Hz, 2H, phenyl), 4.24 (dd, *J* = 9.3, 4.3 Hz, 4H, -OCOCH<sub>2</sub>-), 4.05 (t, *J* = 6.4 Hz, 2H, -OCH<sub>2</sub>CH<sub>2</sub>-), 3.73-3.67 (m, 4H, -OCOCH<sub>2</sub>-), 3.65 (s, 8H, -OCH<sub>2</sub>CH<sub>2</sub>O-), 3.63-3.57 (m, 2H, -CH<sub>2</sub>Br), 3.13 (s, 1H, -C≡CH), 2.37 (dt, *J* = 12.9, 7.4 Hz, 4H, -CH<sub>2</sub>COO-), 1.91-1.77 (m, 4H, -CH<sub>2</sub>CH<sub>2</sub>-), 1.68 (ddd, *J* = 21.8, 15.0, 7.2 Hz, 4H, -CH<sub>2</sub>CH<sub>2</sub>-), 1.60-1.42 (m, 4H, -CH<sub>2</sub>CH<sub>2</sub>-).

### Synthesis of alkynyl-Azo-TEG-N<sub>3</sub>

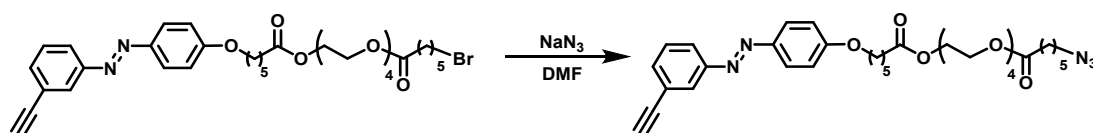

<sup>1</sup>H NMR (300 MHz, CDCl<sub>3</sub>) δ 8.10-7.77 (m, 4H, phenyl), 7.49 (dt, *J* = 15.5, 7.7 Hz, 2H, phenyl), 6.99 (d, *J* = 8.9 Hz, 2H, phenyl), 4.23 (dd, *J* = 9.3, 4.3 Hz, 4H, -OCOCH<sub>2</sub>-), 4.05 (t, *J* = 6.4 Hz, 2H, -OCH<sub>2</sub>CH<sub>2</sub>-), 3.70 (dt, *J* = 8.3, 3.5 Hz, 4H, -OCOCH<sub>2</sub>-), 3.65 (d, *J* = 1.1 Hz, 8H, -OCH<sub>2</sub>CH<sub>2</sub>O-), 3.27 (t, *J* = 6.8 Hz, 2H, -CH<sub>2</sub>N<sub>3</sub>), 3.13 (s, 1H, -C≡CH), 2.53-2.28 (m, 4H, -CH<sub>2</sub>COO-), 1.92-1.31 (m, 12H, -CH<sub>2</sub>CH<sub>2</sub>-).

### Synthesis of TMS-Azo-TEG-N<sub>3</sub>

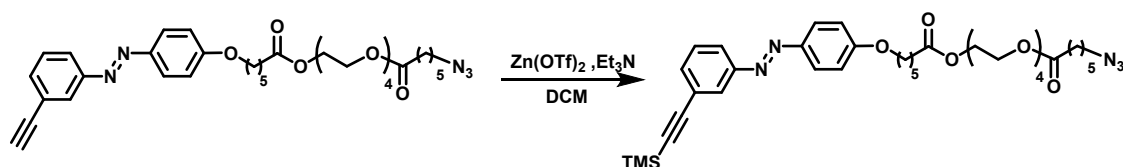

<sup>1</sup>H NMR (300 MHz, CDCl<sub>3</sub>) δ 8.03-7.75 (m, 4H, phenyl), 7.58-7.38 (m, 2H, phenyl), 6.99 (d, *J* = 8.1 Hz, 2H, phenyl), 4.23 (s, 4H, -OCOCH<sub>2</sub>-), 4.05 (s, 2H, -OCH<sub>2</sub>CH<sub>2</sub>-), 3.69 (s, 4H, -OCOCH<sub>2</sub>-), 3.65 (s, 8H, -OCH<sub>2</sub>CH<sub>2</sub>O-), 3.27 (s, 2H, -CH<sub>2</sub>TMS), 2.46-2.29 (m, 4H, -CH<sub>2</sub>COO-), 1.92-1.31 (m, 12H, -CH<sub>2</sub>CH<sub>2</sub>-), 0.27 (s, 9H, -SiH<sub>3</sub>).

### Synthesis of *l*-(Azo<sub>2</sub>-TEG<sub>1</sub>) (n = 1)

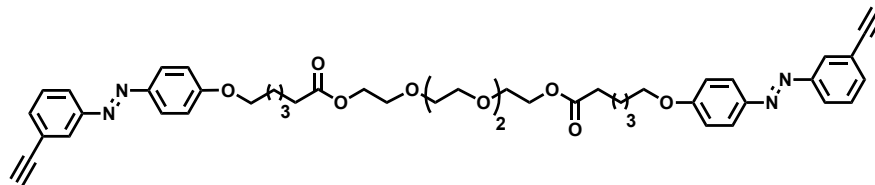

<sup>1</sup>H NMR (300 MHz, CDCl<sub>3</sub>) δ 8.00 (s, 2H, phenyl), 7.95-7.82 (m, 6H, phenyl), 7.49 (dt, *J* = 15.5, 7.7 Hz, 4H, phenyl), 6.99 (d, *J* = 8.9 Hz, 4H, phenyl), 4.28-4.20 (m, 4H, -OCOCH<sub>2</sub>CH<sub>2</sub>-), 4.04 (t, *J* = 6.4 Hz, 4H, -OCH<sub>2</sub>CH<sub>2</sub>-), 3.73-3.61 (m, 12H, -CH<sub>2</sub>CH<sub>2</sub>-), 3.13 (s, 2H, -C≡CH), 2.39 (t, *J* = 7.4 Hz, 4H, -OCOCH<sub>2</sub>CH<sub>2</sub>-), 1.90-1.45 (m, 12H, -CH<sub>2</sub>CH<sub>2</sub>-).

### Synthesis of *c*-(Azo<sub>2</sub>-TEG<sub>1</sub>) (n = 1)

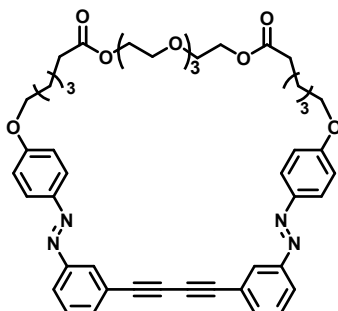

<sup>1</sup>H NMR (300 MHz, CDCl<sub>3</sub>) δ 8.00 (s, 2H, phenyl), 7.95-7.82 (m, 6H, phenyl), 7.49 (dt, *J* = 15.5, 7.7 Hz, 4H, phenyl), 6.99 (d, *J* = 8.9 Hz, 4H, phenyl), 4.28-4.20 (m, 4H, -OCOCH<sub>2</sub>CH<sub>2</sub>-), 4.04 (t, *J* = 6.4 Hz, 4H, -OCH<sub>2</sub>CH<sub>2</sub>-), 3.73-3.61 (m, 12H, -CH<sub>2</sub>CH<sub>2</sub>-), 2.39 (t, *J* = 7.4 Hz, 4H, -OCOCH<sub>2</sub>CH<sub>2</sub>-), 1.90-1.45 (m, 12H, -CH<sub>2</sub>CH<sub>2</sub>-).

### Synthesis of TMS-(Azo-TEG)<sub>2</sub>-Br for general procedure for “CuAAC” reaction

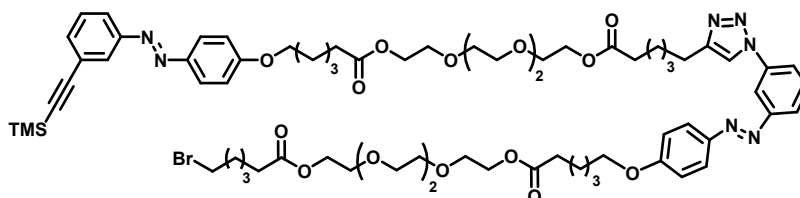

<sup>1</sup>H NMR (300 MHz, CDCl<sub>3</sub>) δ 8.28 (s, 1H, triazole ring), 8.12-6.68 (m, 16H, pheny), 4.43 (t, *J* = 7.1 Hz,

2H, triazole-CH<sub>2</sub>CH<sub>2</sub>-), 4.28-4.18 (m, 8H, -OCOCH<sub>2</sub>-), 4.04 (dd, *J* = 10.5, 6.2 Hz, 4H, -OCH<sub>2</sub>CH<sub>2</sub>-), 3.70 (dd, *J* = 9.4, 4.7 Hz, 8H, -OCOCH<sub>2</sub>-), 3.65 (d, *J* = 1.4 Hz, 16H, -OCH<sub>2</sub>CH<sub>2</sub>O-), 3.40 (s, 2H, -CH<sub>2</sub>Br), 2.35 (s, 8H, -CH<sub>2</sub>COO-), 1.93-1.44 (m, 24H, -CH<sub>2</sub>CH<sub>2</sub>-), 0.27 (s, 9H, -SiH<sub>3</sub>).

### Synthesis of (Azo-TEG)<sub>2</sub>-Br for alkyne deprotection

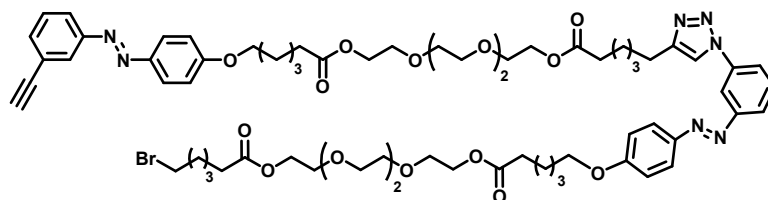

<sup>1</sup>H NMR (300 MHz, CDCl<sub>3</sub>) δ 8.28 (s, 1H, triazole ring), 8.12-6.68 (m, 16H, pheny), 4.43 (t, *J* = 7.1 Hz, 2H, triazole-CH<sub>2</sub>CH<sub>2</sub>-), 4.28-4.18 (m, 8H, -OCOCH<sub>2</sub>-), 4.04 (dd, *J* = 10.5, 6.2 Hz, 4H, -OCH<sub>2</sub>CH<sub>2</sub>-), 3.70 (dd, *J* = 9.4, 4.7 Hz, 8H, -OCOCH<sub>2</sub>-), 3.65 (d, *J* = 1.4 Hz, 16H, -OCH<sub>2</sub>CH<sub>2</sub>O-), 3.40 (s, 2H, -CH<sub>2</sub>Br), 3.13 (s, 1H, -C≡CH), 2.35 (s, 8H, -CH<sub>2</sub>COO-), 1.93-1.44 (m, 24H, -CH<sub>2</sub>CH<sub>2</sub>-).

### Synthesis of *l*-(Azo<sub>3</sub>-TEG<sub>2</sub>) (*n* = 2)

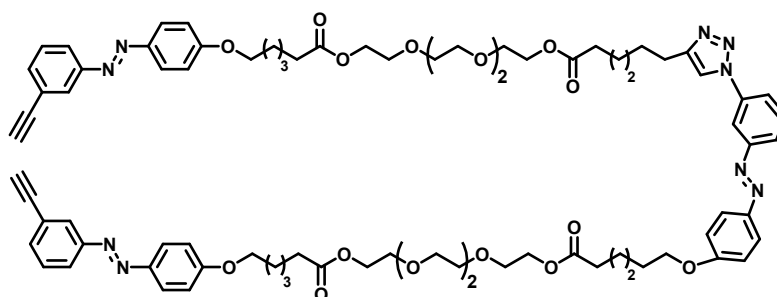

The *l*-(Azo<sub>3</sub>-TEG<sub>2</sub>) was prepared using the similar procedures as *l*-(Azo<sub>2</sub>-TEG<sub>1</sub>). A solution of (Azo-TEG)<sub>2</sub>-Br (1.339 g, 1 mmol), HAAzo (0.888 g, 4 mmol), potassium carbonate (0.552 g, 1 mmol), a catalytic amount of potassium iodide, and 50 mL of DMF was prepared in a 100mL round bottom flask under vigorous stirring. The solution was stirred at 80 °C for 4h. After cooling to room temperature, deionized water (4×200 mL) was added and the mixture was extracted with ethyl acetate (200 mL). The organic layer obtained was dried with anhydrous MgSO<sub>4</sub> overnight, filtered, and evaporated in a reduced pressure. The final crude product was purified by column chromatography (silica gel, ethyl acetate) to

yield the *l*-(Azo<sub>3</sub>-TEG<sub>2</sub>) as yellow liquid (1.33 g, 90.9%). <sup>1</sup>H NMR (300 MHz, CDCl<sub>3</sub>) δ 8.27 (s, 1H, triazole ring), 8.07-6.81 (m, 24H, pheny), 4.42 (t, *J* = 7.1 Hz, 2H, triazole-CH<sub>2</sub>CH<sub>2</sub>-), 4.29-4.15 (m, 8H, -OCOCH<sub>2</sub>-), 4.03 (t, *J* = 6.3 Hz, 6H, -OCH<sub>2</sub>CH<sub>2</sub>-), 3.75-3.66 (m, 8H, -OCOCH<sub>2</sub>-), 3.66-3.53 (m, 16H, -OCH<sub>2</sub>CH<sub>2</sub>O-), 3.13 (s, 2H, -C≡CH), 2.58-2.21 (m, 8H, -CH<sub>2</sub>COO-), 2.12-1.19 (m, 24H, -CH<sub>2</sub>CH<sub>2</sub>-).

### Synthesis of *c*-(Azo<sub>3</sub>-TEG<sub>2</sub>) (*n* = 2)

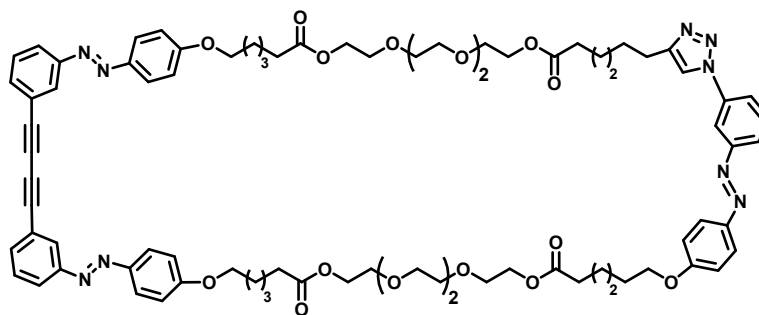

To a 1000 mL three-necked round-bottomed flask was added acetone (800 mL), triethylamine 50 mL, CuI (0.955 g, 50 mmol), and TMEDA (1.5 mL, 10 mmol), and the solution was stirred for 1 h. The *l*-(Azo<sub>3</sub>-TEG<sub>2</sub>) (0.148 g, 0.1 mmol) in 20 mL of acetone was added to CuI/TMEDA mixture at room temperature *via* syring pump at rate of 0.4 mL/h. After the addition of polymer solution was completed, the reaction was allowed to proceed for another period of 24 h. The reaction solution was concentrated in a reduced pressure, deionized water (3×500 mL) was added and the mixture was extracted with ethyl acetate (400 mL) to remove the copper catalyst residues. The organic layer obtained was dried with anhydrous MgSO<sub>4</sub> overnight, filtered, and evaporated in a reduced pressure. The final crude product was purified by column chromatography (silica gel, ethyl acetate) to yield *c*-(Azo<sub>3</sub>-TEG<sub>2</sub>) as yellow liquid (0.082 g, 80%). <sup>1</sup>H NMR (300 MHz, CDCl<sub>3</sub>) δ 8.27 (s, 1H, triazole ring), 8.07-6.81 (m, 24H, pheny), 4.42 (t, *J* = 7.1 Hz, 2H, triazole-CH<sub>2</sub>CH<sub>2</sub>-), 4.29-4.15 (m, 8H, -OCOCH<sub>2</sub>-), 4.03 (t, *J* = 6.3 Hz, 6H, -OCH<sub>2</sub>CH<sub>2</sub>-), 3.75-3.66 (m, 8H, -OCOCH<sub>2</sub>-), 3.66-3.53 (m, 16H, -OCH<sub>2</sub>CH<sub>2</sub>O-), 2.58-2.21 (m, 8H, -CH<sub>2</sub>COO-), 2.12-1.19 (m, 24H, -CH<sub>2</sub>CH<sub>2</sub>-).

## Synthesis of TMS-(Azo-TEG)<sub>3</sub>-Br

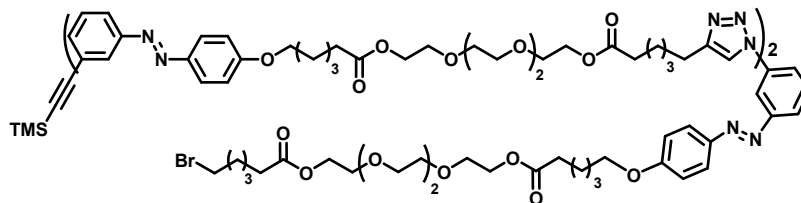

The TMS-(Azo-TEG)<sub>3</sub>-Br was prepared from (Azo-TEG)<sub>2</sub>-Br (3.3g, 2.46 mmol) and TMS-Azo-TEG-N<sub>3</sub> (2.13 g, 2.95 mmol) according to the general procedure for click coupling reaction. The product was purified by column chromatography (silica gel, THF/petroleum ether = 1/1) to yield TMS-(Azo-TEG)<sub>3</sub>-Br as yellow liquid (4.77 g, 94%). <sup>1</sup>H NMR (300 MHz, CDCl<sub>3</sub>) δ 8.28 (s, 2H, triazole ring), 8.09-6.76 (m, 32H, pheny), 4.41 (dd, *J* = 15.5, 8.5 Hz, 4H, triazole-CH<sub>2</sub>CH<sub>2</sub>-), 4.23 (s, 14H, -OCOCH<sub>2</sub>-), 4.04 (d, *J* = 4.2 Hz, 6H, -OCH<sub>2</sub>CH<sub>2</sub>-), 3.75-3.67 (m, 12H, -OCOCH<sub>2</sub>-), 3.64 (d, *J* = 3.8 Hz, 32H, -OCH<sub>2</sub>CH<sub>2</sub>O-), 3.40 (t, *J* = 6.7 Hz, 2H, -CH<sub>2</sub>Br), 2.37 (dt, *J* = 14.8, 7.3 Hz, 12H, -CH<sub>2</sub>COO-), 1.93-1.44 (m, 36H, -CH<sub>2</sub>CH<sub>2</sub>-), 0.27 (s, 9H, -SiH<sub>3</sub>).

## Synthesis of (Azo-TEG)<sub>3</sub>-Br

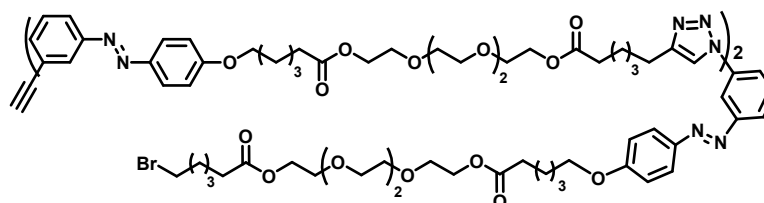

The (Azo-TEG)<sub>3</sub>-Br was prepared from the TMS-(Azo-TEG)<sub>3</sub>-Br (4.77 g, 2.3 mmol) according to the general procedure for alkyne deprotection, yielding 4.44 g of a viscous yellow oil (97%). <sup>1</sup>H NMR (300 MHz, CDCl<sub>3</sub>) δ 8.28 (s, 2H, triazole ring), 8.09-6.76 (m, 32H, pheny), 4.41 (dd, *J* = 15.5, 8.5 Hz, 4H, triazole-CH<sub>2</sub>CH<sub>2</sub>-), 4.23 (s, 14H, -OCOCH<sub>2</sub>-), 4.04 (d, *J* = 4.2 Hz, 6H, -OCH<sub>2</sub>CH<sub>2</sub>-), 3.75-3.67 (m, 12H, -OCOCH<sub>2</sub>-), 3.64 (d, *J* = 3.8 Hz, 32H, -OCH<sub>2</sub>CH<sub>2</sub>O-), 3.40 (t, *J* = 6.7 Hz, 2H, -CH<sub>2</sub>Br), 3.13 (s, 1H, -C≡CH), 2.37 (dt, *J* = 14.8, 7.3 Hz, 12H, -CH<sub>2</sub>COO-), 1.93-1.44 (m, 36H, -CH<sub>2</sub>CH<sub>2</sub>-).

### Synthesis of *l*-(Azo<sub>4</sub>-TEG<sub>3</sub>) (n = 3)

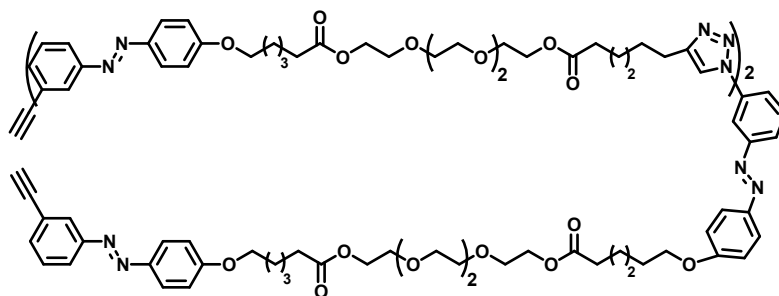

The *l*-(Azo<sub>4</sub>-TEG<sub>3</sub>) was prepared from (Azo-TEG)<sub>3</sub>-Br (1.99 g, 1 mmol) using the similar procedures as *l*-(Azo<sub>2</sub>-TEG<sub>1</sub>). The yield *l*-(Azo<sub>4</sub>-TEG<sub>3</sub>) as yellow liquid (2.06 g, 97%). <sup>1</sup>H NMR (300 MHz, CDCl<sub>3</sub>) δ 8.28 (t, *J* = 1.6 Hz, 2H, triazole ring), 8.09-6.62 (m, 32H, pheny), 4.41 (t, *J* = 7.0 Hz, 4H, triazole-CH<sub>2</sub>CH<sub>2</sub>-), 4.23 (dt, *J* = 6.1, 3.4 Hz, 12H, -OCOCH<sub>2</sub>-), 4.03 (t, *J* = 6.3 Hz, 8H, -OCH<sub>2</sub>CH<sub>2</sub>-), 3.73-3.66 (m, 12H, -OCOCH<sub>2</sub>-), 3.64 (dd, *J* = 5.1, 1.9 Hz, 24H, -OCH<sub>2</sub>CH<sub>2</sub>O-), 3.13 (s, 2H, -C≡CH), 2.52-2.27 (m, 12H, -CH<sub>2</sub>COO-), 2.07-1.26 (m, 24H, -CH<sub>2</sub>CH<sub>2</sub>-).

### Synthesis of *c*-(Azo<sub>4</sub>-TEG<sub>3</sub>) (n = 3)

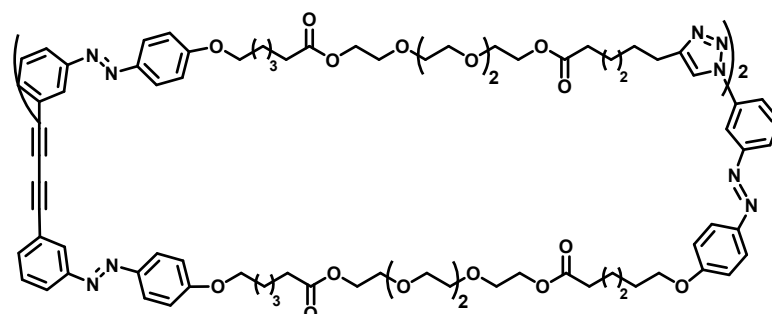

The *c*-(Azo<sub>4</sub>-TEG<sub>3</sub>) was prepared from *l*-(Azo<sub>4</sub>-TEG<sub>3</sub>) (158 mg, 0.07 mmol) according to the cyclization procedure above, using a 300 eq CuI. The yield *l*-(Azo<sub>4</sub>-TEG<sub>3</sub>) was purified by preparative GPC as yellow liquid (137 mg, 80%). <sup>1</sup>H NMR (300 MHz, CDCl<sub>3</sub>) δ 8.25 (s, 2H, triazole ring), 8.10-6.63 (m, 32H, pheny), 4.52-4.29 (m, 4H, triazole-CH<sub>2</sub>CH<sub>2</sub>-), 4.31-4.12 (m, 12H, -OCOCH<sub>2</sub>-), 4.02 (dd, *J* = 7.5, 5.0 Hz, 8H, -OCH<sub>2</sub>CH<sub>2</sub>-), 3.69 (dt, *J* = 9.0, 3.4 Hz, 12H, -OCOCH<sub>2</sub>-), 3.65-3.54 (m, 24H, -OCH<sub>2</sub>CH<sub>2</sub>O-), 2.58-2.22 (m, 12H, -CH<sub>2</sub>COO-), 2.06-1.08 (m, 24H, -CH<sub>2</sub>CH<sub>2</sub>-).



## Synthesis of TMS-(Azo-TEG)<sub>4</sub>-Br

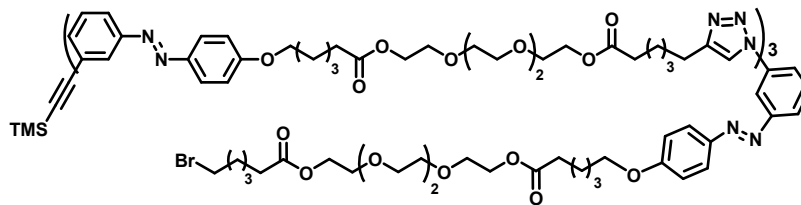

The TMS-(Azo-TEG)<sub>4</sub>-Br was prepared from (Azo-TEG)<sub>3</sub>-Br (2.4 g, 1.2 mmol) and TMS-Azo-TEG-N<sub>3</sub> (1.04 g, 1.44 mmol) according to the “CuAAC” reaction above. The product was purified by column chromatography (silica gel, THF/petroleum ether = 2/1) to yield TMS-(Azo-TEG)<sub>4</sub>-Br as yellow liquid (2.93 g, 90%). <sup>1</sup>H NMR (300 MHz, CDCl<sub>3</sub>) δ 8.28 (s, 3H, triazole ring), 8.03-6.43 (m, 32H, pheny), 4.42 (t, *J* = 7.0 Hz, 6H, triazole-CH<sub>2</sub>CH<sub>2</sub>-), 4.23 (td, *J* = 7.9, 3.9 Hz, 16H, -OCOCH<sub>2</sub>-), 4.11-3.95 (m, 8H, -OCH<sub>2</sub>CH<sub>2</sub>-), 3.72-3.65 (m, 16H, -OCOCH<sub>2</sub>-), 3.64 (dd, *J* = 5.2, 1.8 Hz, 32H, -OCH<sub>2</sub>CH<sub>2</sub>O-), 3.57-3.32 (m, 2H, -CH<sub>2</sub>Br), 2.48-2.28 (m, 16H, -CH<sub>2</sub>COO-), 2.12-1.30 (m, 48H, -CH<sub>2</sub>CH<sub>2</sub>-), 0.27 (s, 9H, -SiH<sub>3</sub>).

## Synthesis of (Azo-TEG)<sub>4</sub>-Br

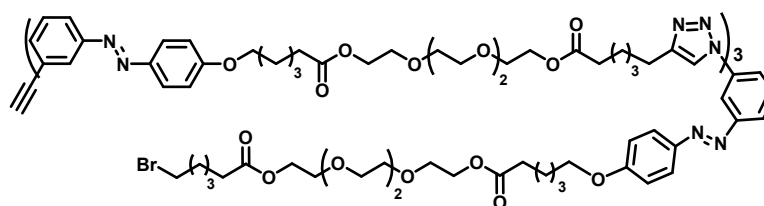

The (Azo-TEG)<sub>4</sub>-Br was prepared from TMS-(Azo-TEG)<sub>4</sub>-Br (2.93 g, 1 mmol) according to the alkyne deprotection above, yielding 2.56 g of a yellow liquid (97%). <sup>1</sup>H NMR (300 MHz, CDCl<sub>3</sub>) δ 8.28 (d, *J* = 1.4 Hz, 3H, triazole ring), 8.10-6.71 (m, 32H, pheny), 4.52-4.32 (m, 6H, triazole-CH<sub>2</sub>CH<sub>2</sub>-), 4.23 (td, *J* = 8.1, 4.0 Hz, 16H, -OCOCH<sub>2</sub>-), 4.04 (dd, *J* = 10.4, 6.2 Hz, 8H, -OCH<sub>2</sub>CH<sub>2</sub>-), 3.69 (dd, *J* = 9.7, 4.6 Hz, 16H, -OCOCH<sub>2</sub>-), 3.64 (dd, *J* = 5.1, 1.9 Hz, 32H, -OCH<sub>2</sub>CH<sub>2</sub>O-), 3.60-3.35 (m, 2H, -CH<sub>2</sub>Br), 3.12 (d, *J* = 10.8 Hz, 2H, -C≡CH), 2.37 (dt, *J* = 14.9, 5.8 Hz, 16H, -CH<sub>2</sub>COO-), 2.05-1.24 (m, 48H, -CH<sub>2</sub>CH<sub>2</sub>-).

### Synthesis of *l*-(Azo<sub>5</sub>-TEG<sub>4</sub>) (n = 4)

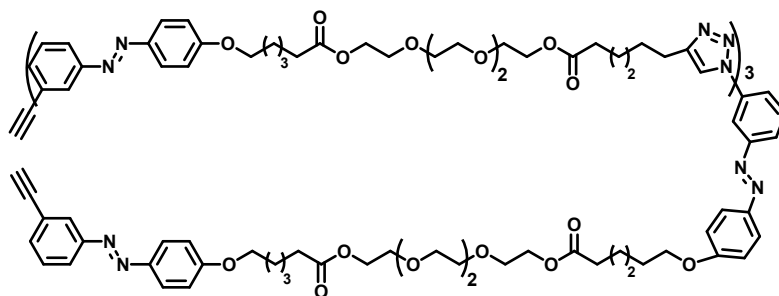

The *l*-(Azo<sub>5</sub>-TEG<sub>4</sub>) was prepared from (Azo-TEG)<sub>4</sub>-Br (1.32 g, 0.5 mmol) using the similar procedures as *l*-(Azo<sub>2</sub>-TEG<sub>1</sub>). The product was purified by column chromatography (silica gel, THF/petroleum ether = 2/1) to yield *l*-(Azo<sub>5</sub>-TEG<sub>4</sub>) as yellow liquid (1.28 g, 90%). <sup>1</sup>H NMR (300 MHz, CDCl<sub>3</sub>) δ 8.27 (t, *J* = 1.6 Hz, 3H, triazole ring), 8.06-6.69 (m, 40H, pheny), 4.50-4.32 (m, 6H, triazole-CH<sub>2</sub>CH<sub>2</sub>-), 4.28-4.14 (m, 16H, -OCOCH<sub>2</sub>-), 4.03 (t, *J* = 6.3 Hz, 10H, -OCH<sub>2</sub>CH<sub>2</sub>-), 3.69 (td, *J* = 5.0, 2.6 Hz, 16H, -OCOCH<sub>2</sub>-), 3.64 (dd, *J* = 5.0, 2.0 Hz, 32H, -OCH<sub>2</sub>CH<sub>2</sub>O-), 3.11 (d, *J* = 10.6 Hz, 2H, -C≡CH), 2.54-2.22 (m, 16H, -CH<sub>2</sub>COO-), 2.06-1.23 (m, 48H, -CH<sub>2</sub>CH<sub>2</sub>-).

### Synthesis of *c*-(Azo<sub>5</sub>-TEG<sub>4</sub>) (n = 4)

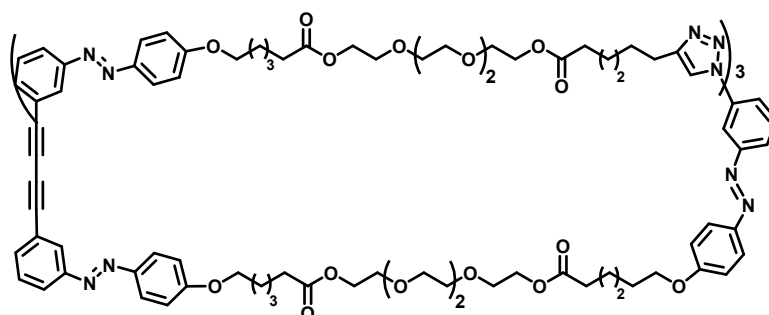

The *c*-(Azo<sub>5</sub>-TEG<sub>4</sub>) was prepared from *l*-(Azo<sub>5</sub>-TEG<sub>4</sub>) (139 mg, 0.05 mmol) according to the general procedure for cyclization, using a 300 eq CuI. The yield *c*-(Azo<sub>5</sub>-TEG<sub>4</sub>) was purified by preparative GPC as yellow liquid (121 mg, 75%). <sup>1</sup>H NMR (300 MHz, CDCl<sub>3</sub>) δ 8.26 (s, 3H, triazole ring), 8.09-6.82 (m, 40H, pheny), 4.39 (dd, *J* = 14.7, 7.6 Hz, 6H, triazole-CH<sub>2</sub>CH<sub>2</sub>-), 4.22 (td, *J* = 7.9, 4.2 Hz, 16H, -OCOCH<sub>2</sub>-), 4.10-3.94 (m, 10H, -OCH<sub>2</sub>CH<sub>2</sub>-), 3.68 (dd, *J* = 9.4, 4.3 Hz, 16H, -OCOCH<sub>2</sub>-), 3.65-3.45 (m, 32H, -OCH<sub>2</sub>CH<sub>2</sub>O-), 2.36 (ddd, *J* = 17.4, 8.4, 5.4 Hz, 16H, -CH<sub>2</sub>COO-), 2.05-1.20 (m, 48H, -CH<sub>2</sub>CH<sub>2</sub>-).

## Synthesis of TMS-(Azo-TEG)<sub>5</sub>-Br

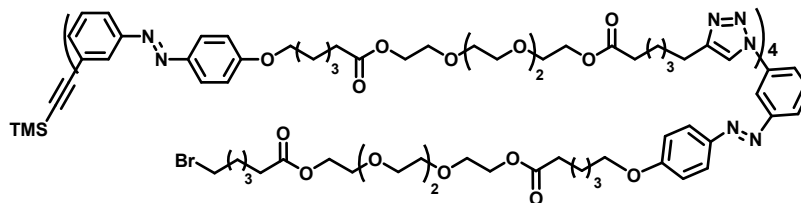

The TMS-(Azo-TEG)<sub>5</sub>-Br was prepared from (Azo-TEG)<sub>4</sub>-Br (1.95 g, 0.738 mmol) and TMS-Azo-TEG-N<sub>3</sub> (0.64 g, 0.885 mmol) according to the CuAAC procedure above. The product was purified by column chromatography (silica gel, THF/petroleum ether = 3/1) to yield TMS-(Azo-TEG)<sub>5</sub>-Br as yellow liquid (2.23 g, 90%). <sup>1</sup>H NMR (300 MHz, CDCl<sub>3</sub>) δ 8.28 (s, 4H, triazole ring), 8.13-6.79 (m, 40H, pheny), 4.42 (t, *J* = 6.8 Hz, 8H, triazole-CH<sub>2</sub>CH<sub>2</sub>-), 4.31-4.15 (m, 20H, -OCOCH<sub>2</sub>-), 4.13-3.93 (m, 10H, -OCH<sub>2</sub>CH<sub>2</sub>-), 3.69 (dd, *J* = 9.7, 4.8 Hz, 20H, -OCOCH<sub>2</sub>-), 3.64 (dd, *J* = 5.3, 1.8 Hz, 40H, -OCH<sub>2</sub>CH<sub>2</sub>O-), 3.46 (dt, *J* = 38.7, 6.7 Hz, 2H, -CH<sub>2</sub>Br), 2.44-2.24 (m, 20H, -CH<sub>2</sub>COO-), 2.04-1.19 (m, 60H, -CH<sub>2</sub>CH<sub>2</sub>-), 0.29-0.20 (m, 9H, -SiH<sub>3</sub>).

## Synthesis of (Azo-TEG)<sub>5</sub>-Br

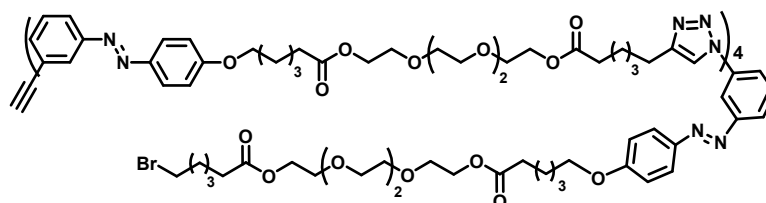

The (Azo-TEG)<sub>5</sub>-Br was prepared from TMS-(Azo-TEG)<sub>5</sub>-Br (2.23 g, 6.6 mmol) according to the alkyne deprotection above, yielding 2.06 g of a viscous yellow oil (94%). <sup>1</sup>H NMR (300 MHz, CDCl<sub>3</sub>) δ 8.27 (s, 4H, triazole ring), 8.03-6.87 (m, 40H, pheny), 4.49-4.34 (m, 8H, triazole-CH<sub>2</sub>CH<sub>2</sub>-), 4.31-4.16 (m, 20H, -OCOCH<sub>2</sub>-), 4.10-3.98 (m, 10H, -OCH<sub>2</sub>CH<sub>2</sub>-), 3.69 (dd, *J* = 9.7, 4.7 Hz, 20H, -OCOCH<sub>2</sub>-), 3.64 (dd, *J* = 5.3, 1.8 Hz, 40H, -OCH<sub>2</sub>CH<sub>2</sub>O-), 3.40 (t, *J* = 6.7 Hz, 2H, -CH<sub>2</sub>Br), 3.11 (d, *J* = 10.5 Hz, 1H, -C≡CH), 2.47-2.26 (m, 20H, -CH<sub>2</sub>COO-), 2.06-1.31 (m, 60H, -CH<sub>2</sub>CH<sub>2</sub>-).

### Synthesis of *l*-(Azo<sub>6</sub>-TEG<sub>5</sub>) (n = 5)

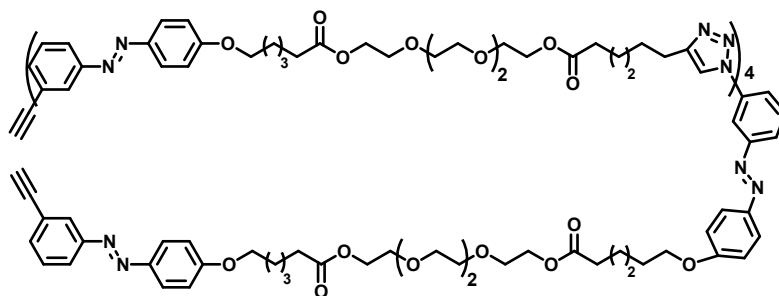

The *l*-(Azo<sub>6</sub>-TEG<sub>5</sub>) was prepared from (Azo-TEG)<sub>5</sub>-Br (548 mg, 0.16 mmol) using the similar procedures of preparing the *l*-(Azo<sub>2</sub>-TEG<sub>1</sub>). The product was purified by column chromatography (silica gel, THF/petroleum ether = 3/1) to yield *l*-(Azo<sub>6</sub>-TEG<sub>5</sub>) as yellow liquid (453 mg, 86%). <sup>1</sup>H NMR (300 MHz, CDCl<sub>3</sub>) δ 8.28 (s, 4H, triazole ring), 8.07-6.60 (m, 48H, pheny), 4.41 (t, *J* = 7.0 Hz, 8H, triazole-CH<sub>2</sub>CH<sub>2</sub>-), 4.22 (dd, *J* = 8.7, 3.9 Hz, 20H, -OCOCH<sub>2</sub>-), 4.03 (t, *J* = 6.3 Hz, 12H, -OCH<sub>2</sub>CH<sub>2</sub>-), 3.68 (dd, *J* = 8.6, 4.0 Hz, 20H, -OCOCH<sub>2</sub>-), 3.64 (d, *J* = 3.7 Hz, 40H, -OCH<sub>2</sub>CH<sub>2</sub>O-), 3.14 (s, 2H, -C≡CH), 2.47-2.26 (m, 20H, -CH<sub>2</sub>COO-), 2.04-1.27 (m, 60H, -CH<sub>2</sub>CH<sub>2</sub>-).

### Synthesis of *c*-(Azo<sub>6</sub>-TEG<sub>5</sub>) (n = 5)

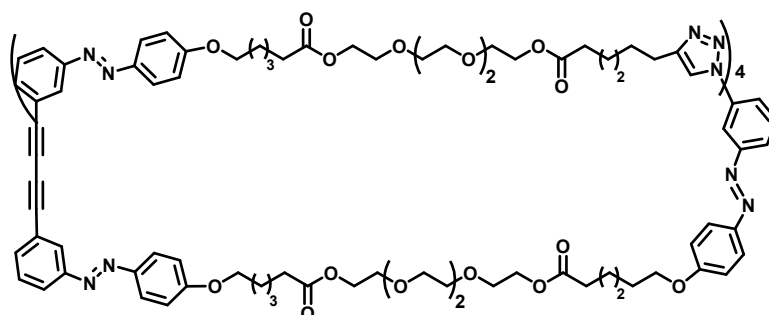

The *c*-(Azo<sub>6</sub>-TEG<sub>5</sub>) was prepared from *l*-(Azo<sub>6</sub>-TEG<sub>5</sub>) (112 mg, 0.03 mmol) according to similar cyclization procedure above, using a 400 eq CuI. The yield *c*-(Azo<sub>6</sub>-TEG<sub>5</sub>) was purified by preparative GPC as yellow liquid (100 mg, 75%). <sup>1</sup>H NMR (300 MHz, CDCl<sub>3</sub>) δ 8.28 (s, 4H, triazole ring), 8.07-6.60 (m, 48H, pheny), 4.41 (t, *J* = 7.0 Hz, 8H, triazole-CH<sub>2</sub>CH<sub>2</sub>-), 4.22 (dd, *J* = 8.7, 3.9 Hz, 20H, -OCOCH<sub>2</sub>-), 4.03 (t, *J* = 6.3 Hz, 12H, -OCH<sub>2</sub>CH<sub>2</sub>-), 3.68 (dd, *J* = 8.6, 4.0 Hz, 20H, -OCOCH<sub>2</sub>-), 3.64 (d, *J* = 3.7 Hz, 40H, -OCH<sub>2</sub>CH<sub>2</sub>O-), 2.47-2.26 (m, 20H, -CH<sub>2</sub>COO-), 2.04-1.27 (m, 60H, -CH<sub>2</sub>CH<sub>2</sub>-)

## Synthesis of TMS-(Azo-TEG)<sub>6</sub>-Br

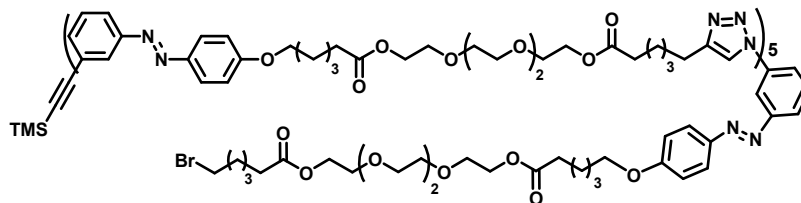

The TMS-(Azo-TEG)<sub>6</sub>-Br was prepared from (Azo-TEG)<sub>5</sub>-Br (2.4 g, 0.738 mmol) and TMS-Azo-TEG-N<sub>3</sub> (0.64 g, 0.885 mmol) according to the click coupling reaction above. The product was purified by column chromatography (silica gel, THF/petroleum ether = 3/1) to yield TMS-(Azo-TEG)<sub>6</sub>-Br as yellow liquid (2.51 g, 85%). <sup>1</sup>H NMR (300 MHz, CDCl<sub>3</sub>) δ 8.28 (s, 5H, triazole ring), 8.13-6.79 (m, 56H, pheny), 4.50-4.31 (m, 10H, triazole-CH<sub>2</sub>CH<sub>2</sub>-), 4.30-4.17 (m, 24H, -OCOCH<sub>2</sub>-), 4.04 (dd, *J* = 8.2, 4.3 Hz, 12H, -OCH<sub>2</sub>CH<sub>2</sub>-), 3.69 (dd, *J* = 9.6, 4.7 Hz, 24H, -OCOCH<sub>2</sub>-), 3.64 (dd, *J* = 5.2, 1.8 Hz, 48H, -OCH<sub>2</sub>CH<sub>2</sub>O-), 3.46 (dt, *J* = 38.7, 6.7 Hz, 2H, -CH<sub>2</sub>Br), 2.38 (ddd, *J* = 16.6, 11.2, 5.8 Hz, 24H, -CH<sub>2</sub>COO-), 2.03-1.11 (m, 72H, -CH<sub>2</sub>CH<sub>2</sub>-), 0.35-0.20 (m, 9H, -SiH<sub>3</sub>).

## Synthesis of (Azo-TEG)<sub>6</sub>-Br

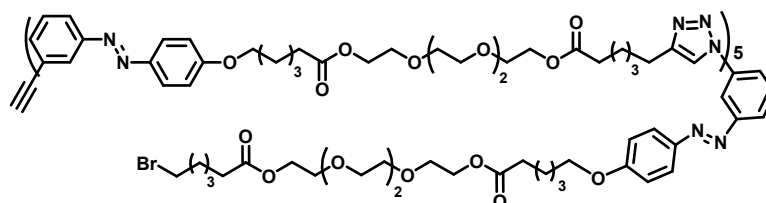

The (Azo-TEG)<sub>6</sub>-Br was prepared from TMS-(Azo-TEG)<sub>6</sub>-Br (2.51 g, 6.3 mmol) according to the general procedure for alkyne deprotection, yielding 2.35 g of a viscous yellow oil (95%). <sup>1</sup>H NMR (300 MHz, CDCl<sub>3</sub>) δ 8.28 (s, 5H, triazole ring), 8.13-6.79 (m, 56H, pheny), 4.50-4.31 (m, 10H, triazole-CH<sub>2</sub>CH<sub>2</sub>-), 4.30-4.17 (m, 24H, -OCOCH<sub>2</sub>-), 4.04 (dd, *J* = 8.2, 4.3 Hz, 12H, -OCH<sub>2</sub>CH<sub>2</sub>-), 3.69 (dd, *J* = 9.6, 4.7 Hz, 24H, -OCOCH<sub>2</sub>-), 3.64 (dd, *J* = 5.2, 1.8 Hz, 48H, -OCH<sub>2</sub>CH<sub>2</sub>O-), 3.46 (dt, *J* = 38.7, 6.7 Hz, 2H, -CH<sub>2</sub>Br), 3.12 (d, *J* = 10.6 Hz, 2H, -C≡CH), 2.38 (ddd, *J* = 16.6, 11.2, 5.8 Hz, 24H, -CH<sub>2</sub>COO-), 2.03-1.11 (m, 72H, -CH<sub>2</sub>CH<sub>2</sub>-).

### Synthesis of *l*-(Azo<sub>7</sub>-TEG<sub>6</sub>) (n = 6)

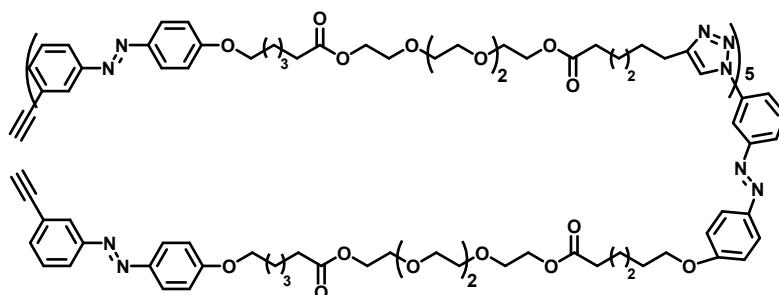

The *l*-(Azo<sub>7</sub>-TEG<sub>6</sub>) was prepared from (Azo-TEG)<sub>6</sub>-Br (408 mg, 0.1 mmol) using the similar procedures as *l*-(Azo<sub>2</sub>-TEG<sub>1</sub>). The product was purified by column chromatography (silica gel, THF/petroleum ether = 3/1) to yield *l*-(Azo<sub>7</sub>-TEG<sub>6</sub>) as yellow liquid (351 mg, 86%). <sup>1</sup>H NMR (300 MHz, CDCl<sub>3</sub>) δ 8.28 (t, *J* = 1.6 Hz, 5H, triazole ring), 8.04-6.87 (m, 56H, pheny), 4.47-4.34 (m, 10H, triazole-CH<sub>2</sub>CH<sub>2</sub>-), 4.23 (dt, *J* = 9.5, 3.2 Hz, 24H, -OCOCH<sub>2</sub>-), 4.03 (t, *J* = 6.4 Hz, 12H, -OCH<sub>2</sub>CH<sub>2</sub>-), 3.72-3.66 (m, 24H, -OCOCH<sub>2</sub>-), 3.64 (dd, *J* = 5.1, 2.0 Hz, 48H, -OCH<sub>2</sub>CH<sub>2</sub>O-), 3.12 (d, *J* = 10.6 Hz, 2H, -C≡CH), 2.42-2.30 (m, 24H, -OCOCH<sub>2</sub>-), 2.06-1.22 (m, 72H, -CH<sub>2</sub>CH<sub>2</sub>-).

### Synthesis of *c*-(Azo<sub>7</sub>-TEG<sub>6</sub>) (n = 6)

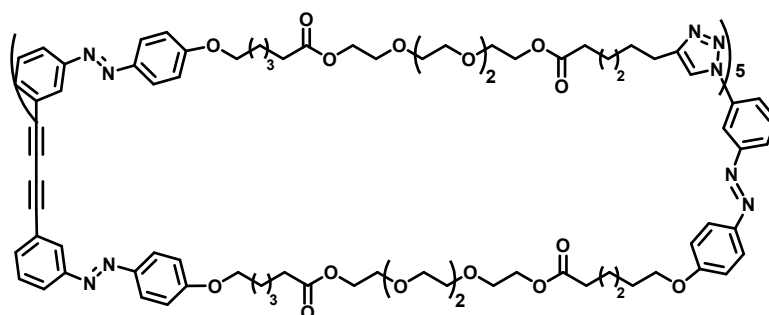

The *c*-(Azo<sub>7</sub>-TEG<sub>6</sub>) was prepared from *l*-(Azo<sub>7</sub>-TEG<sub>6</sub>) (82 mg, 0.02 mmol) according to the similar procedure as cyclization above, using a 400 eq CuI. The yield *c*-(Azo<sub>7</sub>-TEG<sub>6</sub>) was purified by preparative GPC as yellow liquid (73 mg, 70%). <sup>1</sup>H NMR (300 MHz, CDCl<sub>3</sub>) δ 8.27 (s, 5H, triazole ring), 8.07-6.60 (m, 56H, pheny), 4.40 (dd, *J* = 8.8, 5.2 Hz, 10H, triazole-CH<sub>2</sub>CH<sub>2</sub>-), 4.21 (dd, *J* = 6.2, 3.2 Hz, 24H, -OCOCH<sub>2</sub>-), 4.02 (t, *J* = 6.3 Hz, 12H, -OCH<sub>2</sub>CH<sub>2</sub>-), 3.79-3.65 (m, 24H, -OCOCH<sub>2</sub>-), 3.63 (dd, *J* = 4.5, 1.8

Hz, 48H, -OCH<sub>2</sub>CH<sub>2</sub>O-), 2.41-2.30 (m, 24H, -OCOCH<sub>2</sub>-), 2.04-1.27 (m, 72H, -CH<sub>2</sub>CH<sub>2</sub>-).

The generated *c*-(Azo<sub>n+1</sub>-TEG<sub>n</sub>) (when n was larger than 3) was needed to purify by the preparative-GPC to move small amounts of linear precursor. The corresponding GPC traces before and after preparative-GPC can be seen from Figure S2.

### Additional Figures:

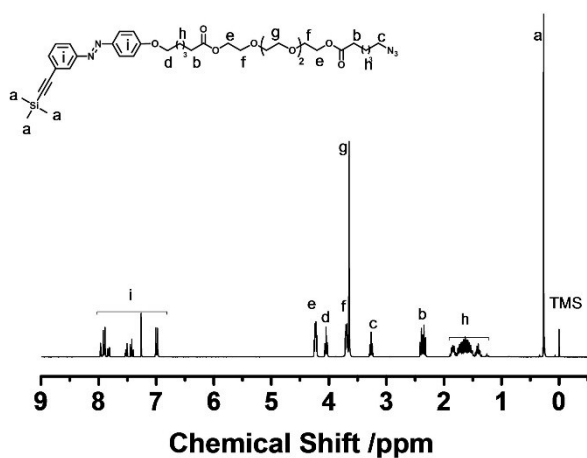

**Figure S1.** <sup>1</sup>H NMR spectrum of TMS-Azo-TEG-N<sub>3</sub> in CDCl<sub>3</sub>.

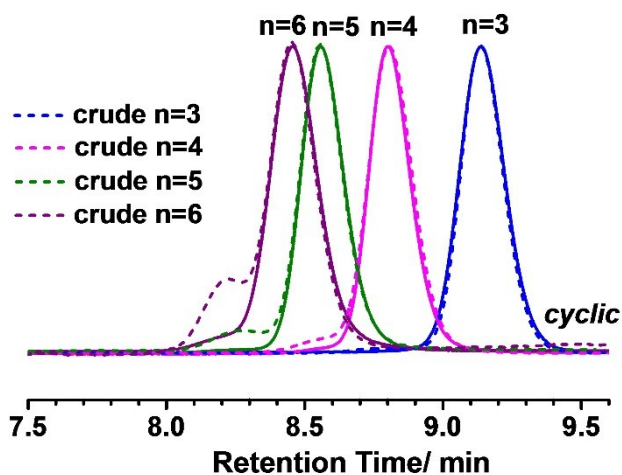

**Figure S2.** The GPC trace of *c*-(Azo<sub>n+1</sub>-TEG<sub>n</sub>) before and after pre-GPC using THF as the eluent (n = 3-6).

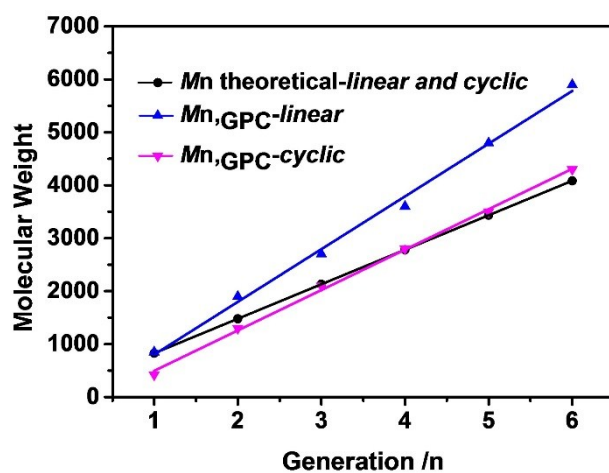

**Figure S3.** The dependence of the theoretical and experimental (determined by GPC) molecular weights of  $l$ -(Azo<sub>n+1</sub>-TEG<sub>n</sub>) and  $c$ -(Azo<sub>n+1</sub>-TEG<sub>n</sub>) on generation ( $n$ ).

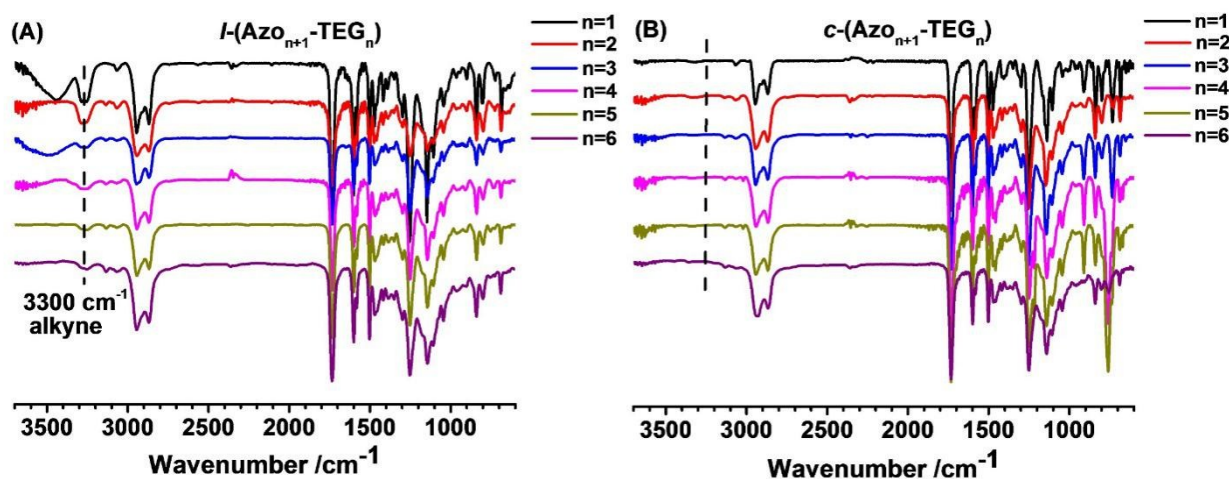

**Figure S4.** The FT-IR spectra of  $l$ -(Azo<sub>n+1</sub>-TEG<sub>n</sub>) (A) and  $c$ -(Azo<sub>n+1</sub>-TEG<sub>n</sub>) (B) ( $n = 1-6$ ).



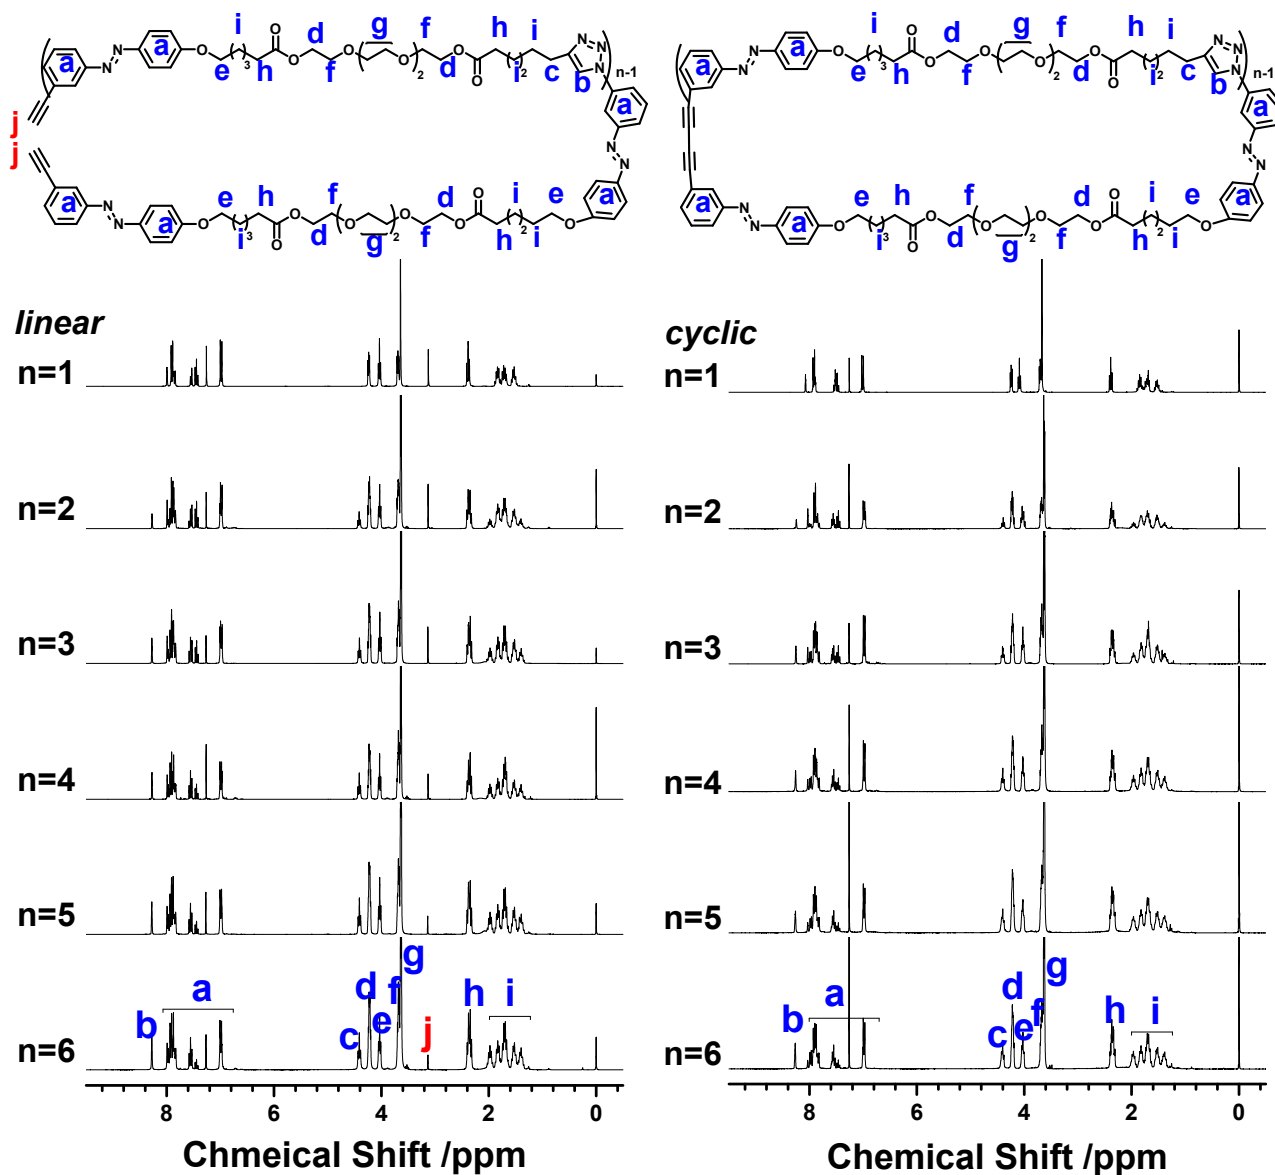

Figure S5.  $^1\text{H}$  NMR spectra of the  $l\text{-(Azo}_{n+1}\text{-TEG}_n)$  and  $c\text{-(Azo}_{n+1}\text{-TEG}_n)$  in  $\text{CDCl}_3$  ( $n=1-6$ ).

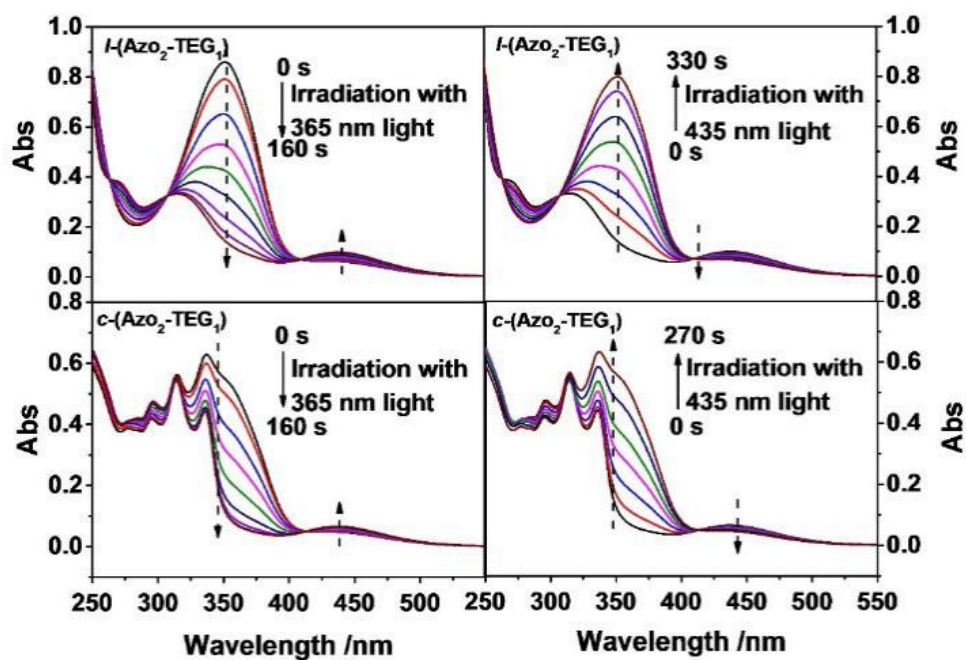

**Figure S6.** The UV-*vis* absorption spectra of *l*-(Azo<sub>2</sub>-TEG<sub>1</sub>) and *c*-(Azo<sub>2</sub>-TEG<sub>1</sub>) in DCM under irradiation with 365 nm UV light and 435 nm visible light at different time intervals until the photo-stationary were achieved, respectively. The concentration of solution is  $1.5 \times 10^{-3}$  mg/mL for both linear and cyclic polymers.

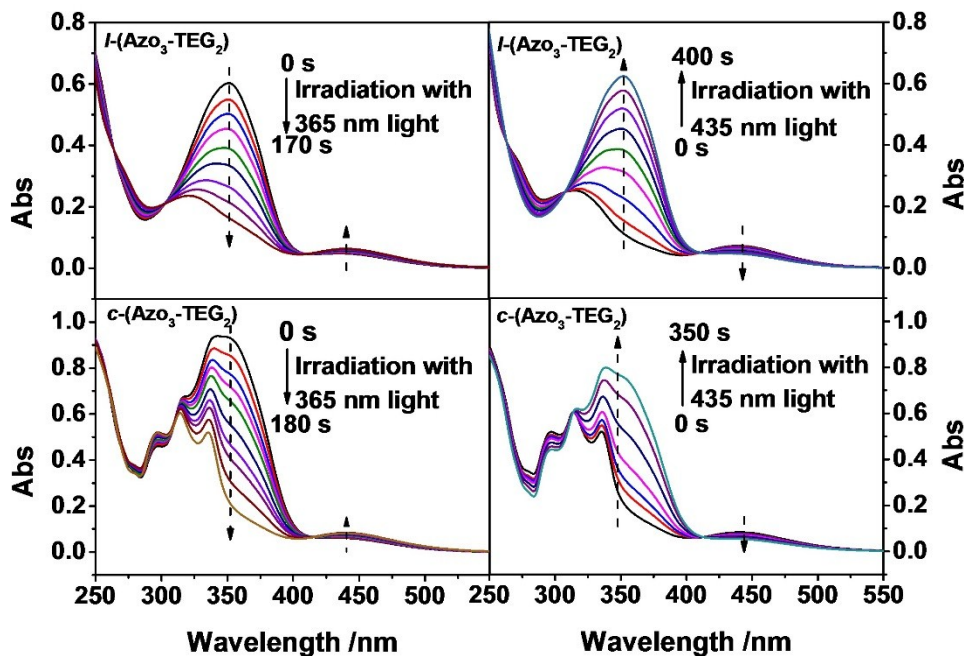

**Figure S7.** The UV-*vis* absorption spectra of *l*-(Azo<sub>3</sub>-TEG<sub>2</sub>) and *c*-(Azo<sub>3</sub>-TEG<sub>2</sub>) in DCM under irradiation with 365 nm UV light and 435 nm visible light at different time intervals until the photo-stationary were achieved, respectively. The concentration of solution is  $1.78 \times 10^{-3}$  mg/mL for both linear and cyclic polymers.

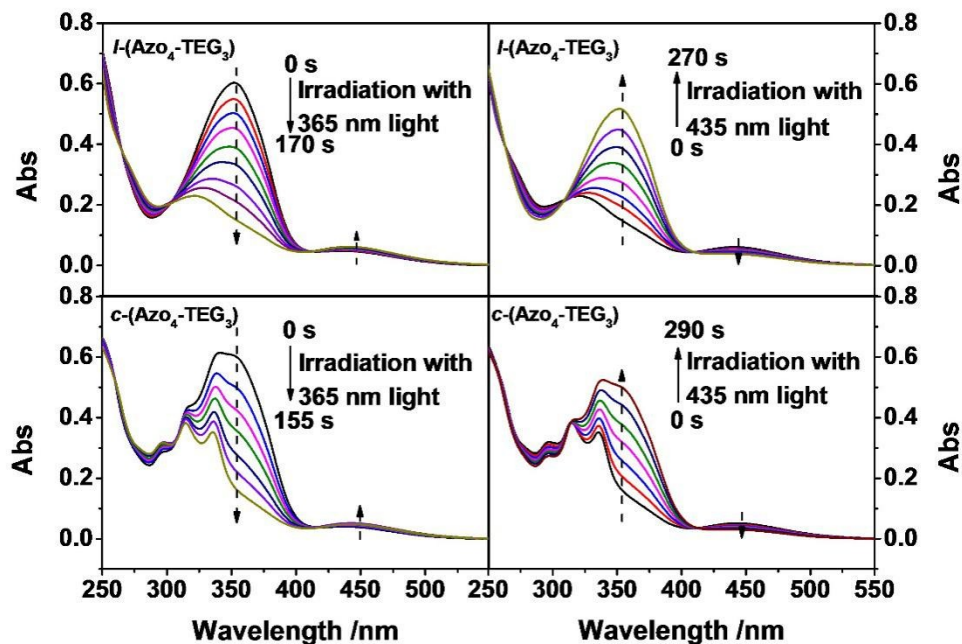

**Figure S8.** The UV-*vis* absorption spectra of *l*-(Azo<sub>4</sub>-TEG<sub>3</sub>) and *c*-(Azo<sub>4</sub>-TEG<sub>3</sub>) in DCM under irradiation with 365 nm UV light and 435 nm visible light at different time intervals until the photo-stationary state were achieved, respectively. The concentration of solution is  $1.92 \times 10^{-3}$  mg/mL for both linear and cyclic polymers.

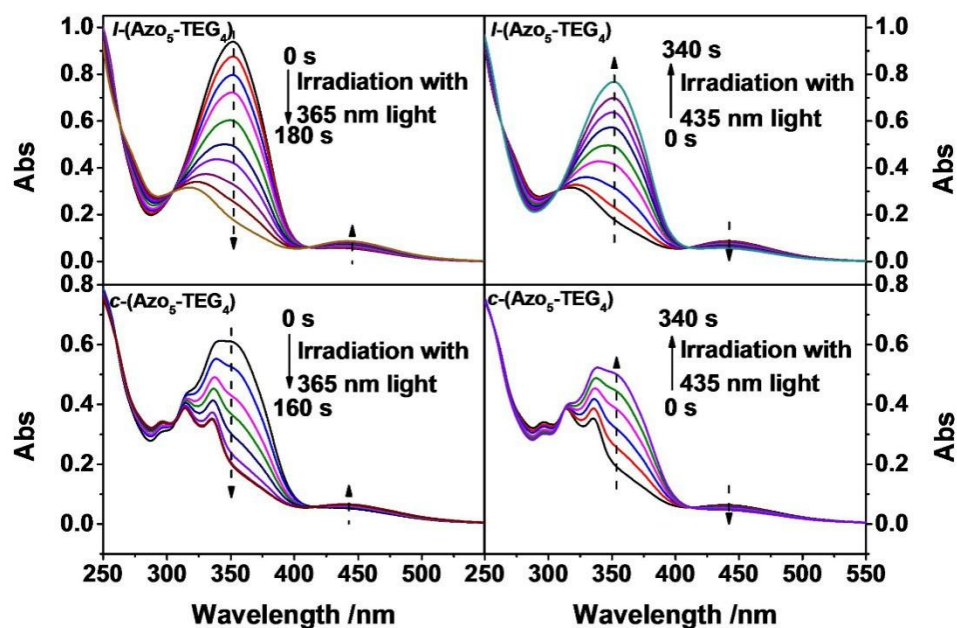

**Figure S9.** The UV-*vis* absorption spectra of *l*-(Azo<sub>5</sub>-TEG<sub>4</sub>) and *c*-(Azo<sub>5</sub>-TEG<sub>4</sub>) in DCM under irradiation with 365 nm UV light and 435 nm visible light at different time intervals until the photo-stationary state were achieved, respectively. The concentration of solution is  $2.01 \times 10^{-3}$  mg/mL for both linear and cyclic polymers.

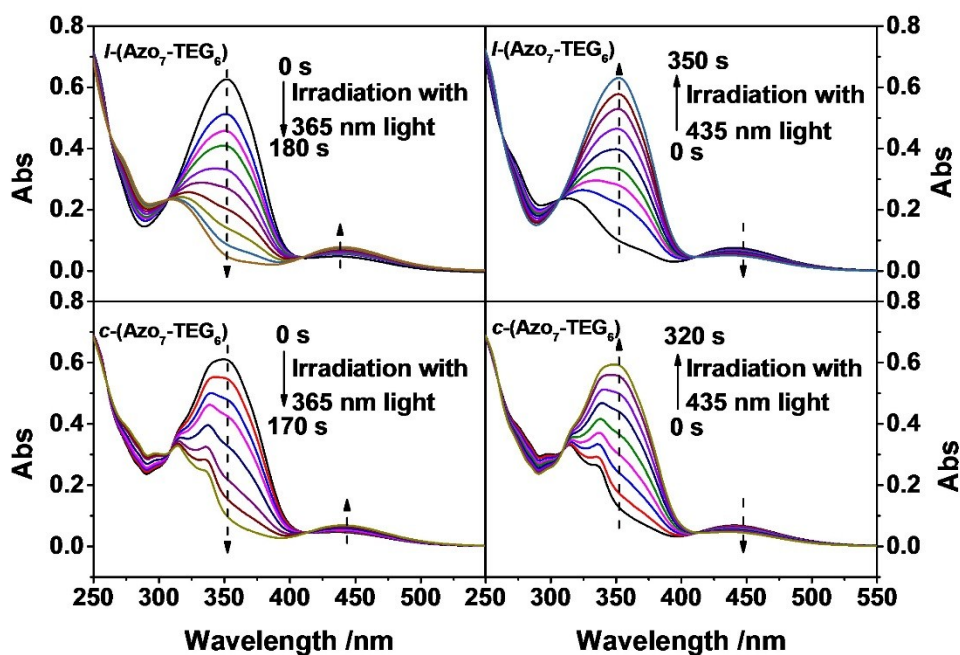

**Figure S10.** The UV-*vis* absorption spectra of *l*-(Azo<sub>7</sub>-TEG<sub>6</sub>) and *c*-(Azo<sub>7</sub>-TEG<sub>6</sub>) in DCM under irradiation with 365 nm UV light and 435 nm visible light at different time intervals until the photo-stationary were achieved, respectively. The concentration of solution is  $2.46 \times 10^{-3}$  mg/mL for both linear and cyclic polymers.

According to DFT and TDDFT calculations,<sup>1</sup> the HOMOs and LUMOs of *c*-(Azo<sub>n+1</sub>-TEG<sub>n</sub>) (n = 1-5) all predominately delocalize on the azobenzene (azo) and alkynyl (yne) group moieties.

As shown in Figure S11(A), the lowest energy band for the *c*-(Azo<sub>2</sub>-TEG<sub>1</sub>) is found around 472 nm mainly originated from HOMO-4→LUMO transitions, which can be assigned to  $\pi^*_{\text{azo}} \rightarrow \pi^*_{\text{azo}}$  and  $\pi^*_{\text{azo}} \rightarrow \pi^*_{\text{yne}}$  due to their orbital characters of corresponding starting and arriving states coming from the azobenzene moieties connected to 1, 3-diyne. For the *c*-(Azo<sub>3</sub>-TEG<sub>2</sub>) (Figures S11(B)) around 476 nm mainly originates from HOMO-7→LUMO transitions, which can also be assigned to  $\pi^*_{\text{azo}} \rightarrow \pi^*_{\text{azo}}$  and  $\pi^*_{\text{azo}} \rightarrow \pi^*_{\text{yne}}$  due to their orbital characters. However, for larger ring, the lowest energy band experimentally found for *c*-(Azo<sub>4</sub>-TEG<sub>3</sub>) (Figures S11(C)), *c*-(Azo<sub>5</sub>-TEG<sub>4</sub>) (Figures S11(D)), and *c*-(Azo<sub>6</sub>-TEG<sub>5</sub>) (Figures S11(E)) around 478 nm transitions are mainly assigned to  $\pi^*_{\text{azo}} \rightarrow \pi^*_{\text{azo}}$ , coming from the third azobenzene group moiety, which is totally different with those small ring complexes (*c*-(Azo<sub>2</sub>-TEG<sub>1</sub>) and *c*-(Azo<sub>3</sub>-TEG<sub>2</sub>)).

According to the calculations, in the UV-*vis* spectra, the absorption at 350 nm for complex  $c\text{-(Azo}_2\text{-TEG}_1)$  may come from the HOMO-2 $\rightarrow$ LUMO+1 transition ( $\pi\rightarrow\pi^*$ ). The characteristic azobenzene and alkynyl of HOMO-2 and LUMO+1 indicate that the HOMO-2 $\rightarrow$ LUMO+1 absorption transition possesses an intramolecular charge transfer (ICT) character. Similarly, the absorptions at about 370 nm of  $c\text{-(Azo}_{n+1}\text{-TEG}_n)$  ( $n = 2\text{-}5$ ) come from  $\pi_{\text{azo (or yne)}}\rightarrow\pi^*_{\text{azo (or yne)}}$  character, probably with some mixing of a charge transfer character from the azobenzene and alkynyl ring.

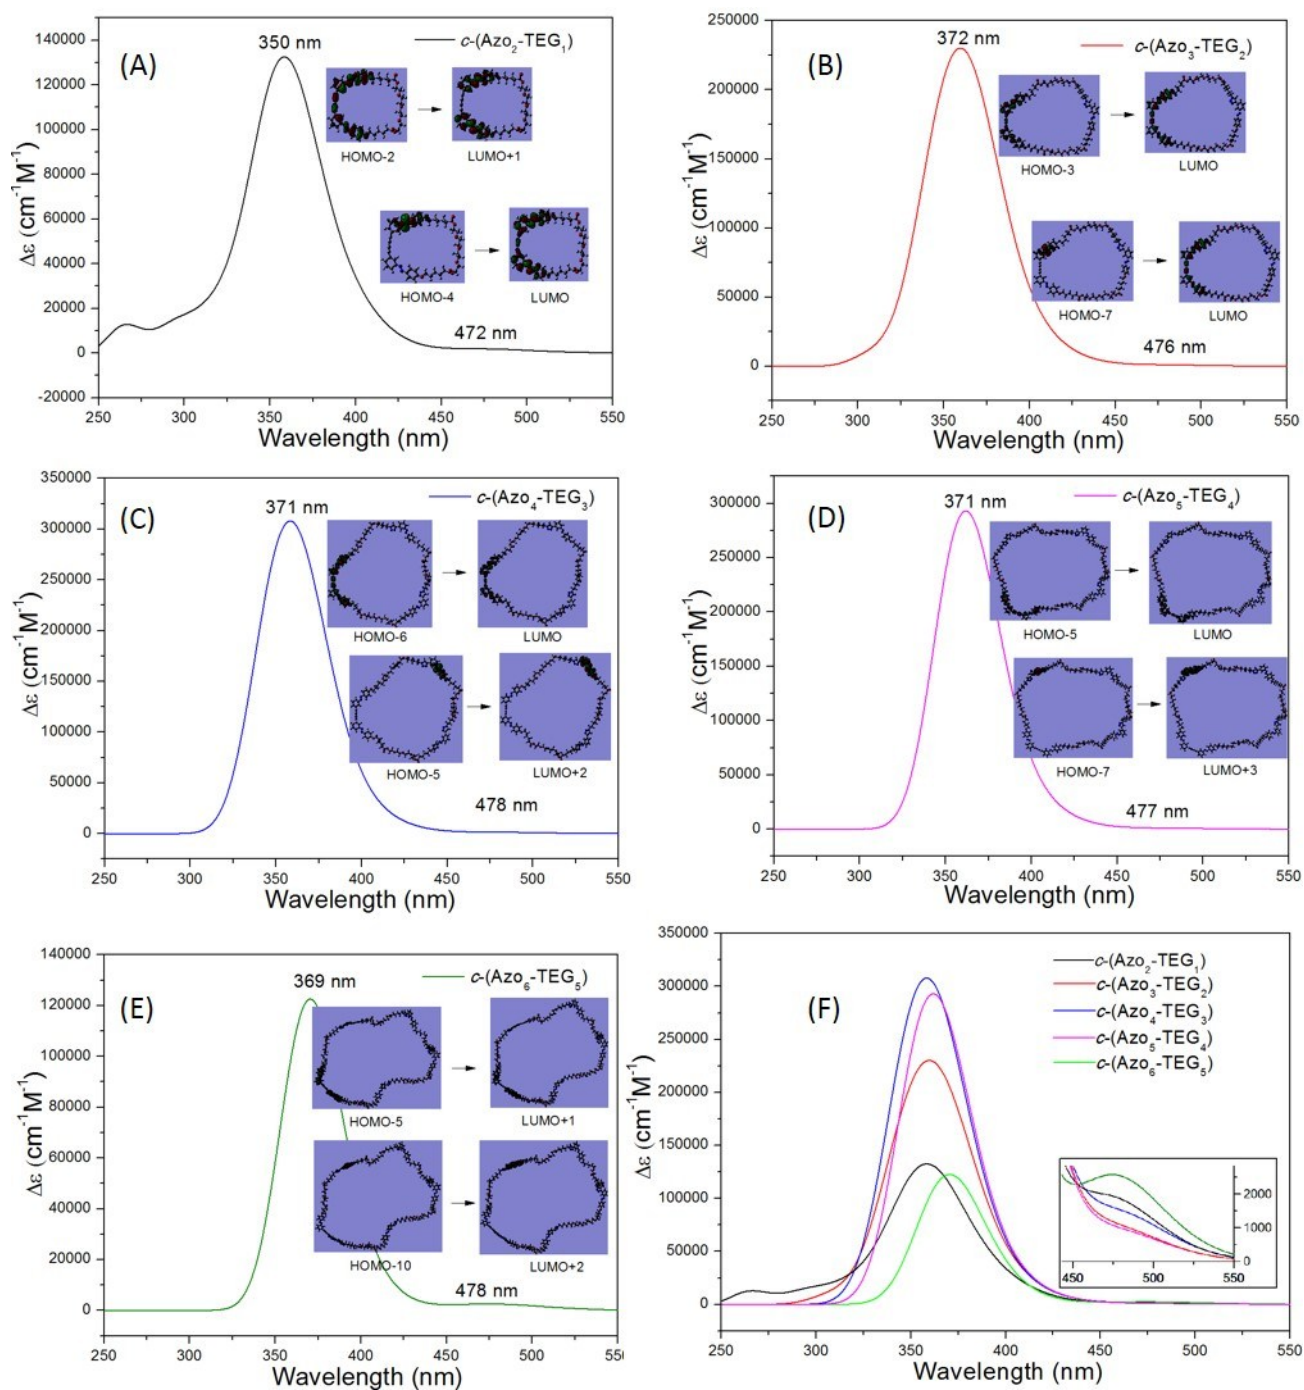

**Figure S11.** Calculated UV-*vis* spectra of the *c*-(Azo<sub>n+1</sub>-TEG<sub>n</sub>) (n = 1-5) at the level of B3LYP/6-31G\*.

The first-order rate constant  $k_e$  of *trans*-to-*cis* photoisomerization was determined by the Formula S1:

$$\text{Ln}[(A_\infty - A_t)/(A_\infty - A_0)] = -k_e t \quad \text{Formula S1}$$

Where  $A_\infty$ ,  $A_t$ , and  $A_0$  are absorbance at about 350 nm corresponded to the  $\pi$ - $\pi^*$  transition of *trans* isomers of azobenzene at infinite time, time  $t$  and time zero with irradiation of 365 nm UV light (0.5 mW cm<sup>-2</sup>) at room temperature, respectively.

The first-order rate constant  $k_H$  of *cis*-to-*trans* recovery was determined by the Formula S2:

$$\text{Ln}[(A_\infty - A_t)/(A_\infty - A_0)] = -k_H t \quad \text{Formula S2}$$

Where  $A_\infty$ ,  $A_t$ , and  $A_0$  are absorbance at about 350 nm corresponded to the  $\pi$ - $\pi^*$  transition of *trans* isomers of azobenzene at infinite time, time  $t$  and time zero with irradiation of 435 nm visible light (0.53 mW cm<sup>-2</sup>) at room temperature, respectively.

The first-order kinetic curves of photo-isomerization are plotted in Figure S13

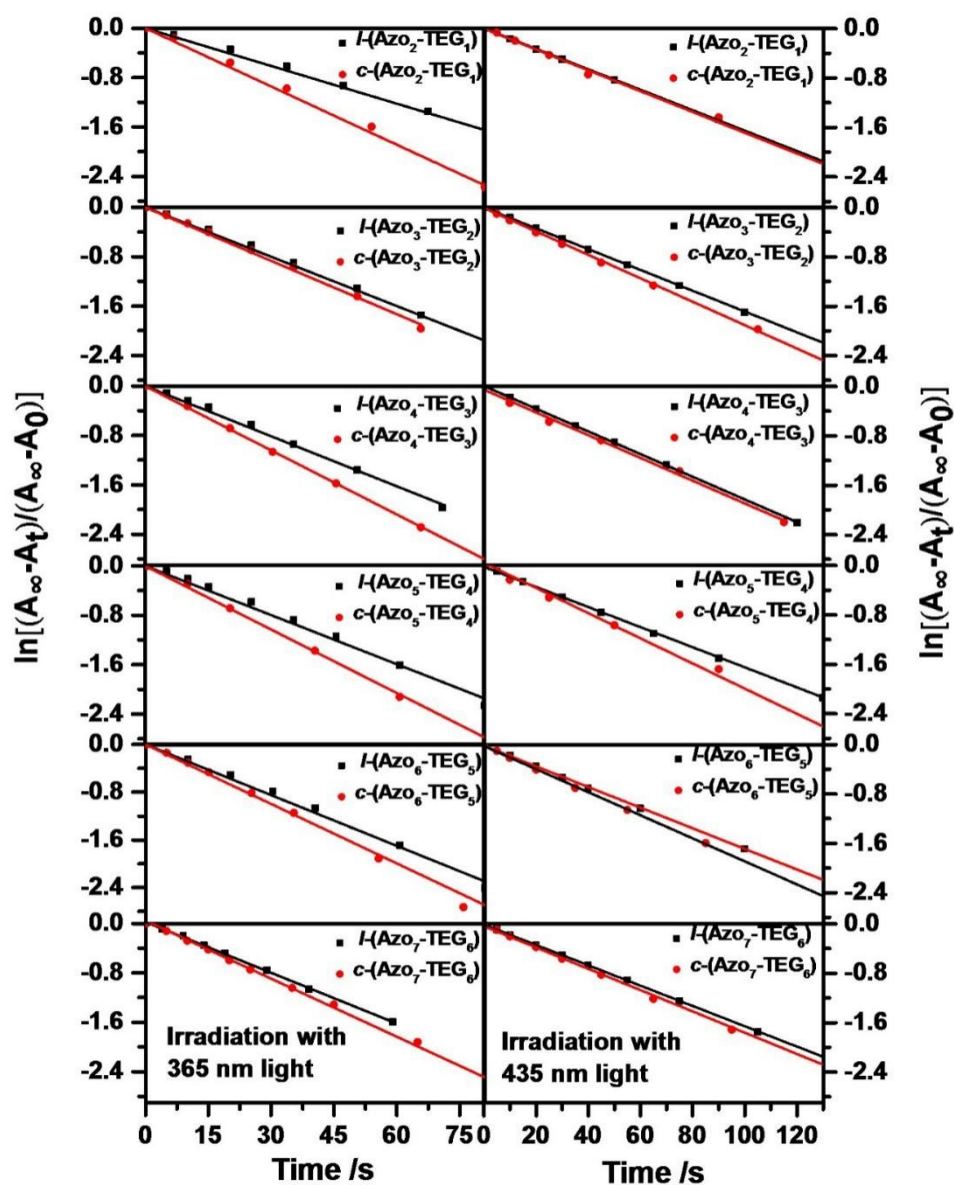

**Figure S12.** First-order kinetics for the photoisomerization of *trans*-to-*cis* and *cis*-to-*trans* recovery of *l*-(Azo<sub>*n*+1</sub>-TEG<sub>*n*</sub>) and *c*-(Azo<sub>*n*+1</sub>-TEG<sub>*n*</sub>) (*n* = 1-6) in DCM corresponding to Figure 3 and Figure S6-S10.

As we know, *trans* to *cis* isomerization of azobenzene moieties leads to new sets of resonances, and thus the resonances of the aromatic protons of the *cis*-azo isomers shift to higher field in <sup>1</sup>H NMR.<sup>2</sup> The characteristic signals of *cis*-azo isomers were confirmed from <sup>1</sup>H NMR spectra of *l*-(Azo<sub>*n*+1</sub>-TEG<sub>*n*</sub>) and *c*-(Azo<sub>*n*+1</sub>-TEG<sub>*n*</sub>) by contrasting their <sup>1</sup>H NMR spectra after UV light radiation (PSS<sub>uv</sub> states). Therefore, the percentage of *cis*-azo isomers in the *l*-(Azo<sub>*n*+1</sub>-TEG<sub>*n*</sub>) (*F*<sub>*l-cis*</sub>) and *c*-(Azo<sub>*n*+1</sub>-TEG<sub>*n*</sub>) (*F*<sub>*c-cis*</sub>) could be calculated quantitatively according to Formula S3 and Formula S4.

$$F_{l-cis} = (1 - I_{l-trans}/I_{l-azo}) \times 100\% \quad \text{Formula S3}$$

$$F_{c-cis} = (1 - I_{c-trans}/I_{c-azo}) \times 100\% \quad \text{Formula S4}$$

Where  $I_{l-azo}$  and  $I_{c-azo}$  are the integrals of characteristic signals of *trans*-azo and *cis*-azo of  $l$ -(Azo<sub>n+1</sub>-TEG<sub>n</sub>) and  $c$ -(Azo<sub>n+1</sub>-TEG<sub>n</sub>) in the aromatic region, and  $I_{l-tran}$  and  $I_{c-tran}$  are the integrals of characteristic signals of *trans*-azo of  $l$ -(Azo<sub>n+1</sub>-TEG<sub>n</sub>) and  $c$ -(Azo<sub>n+1</sub>-TEG<sub>n</sub>) respectively.

For  $l$ -(Azo<sub>2</sub>-TEG<sub>1</sub>),  $I_{l-azo}$  is the integrals of characteristic signals of *trans*-azo and *cis*-azo around from 8.03 ppm to 6.65 ppm, and  $I_{l-tran}$  is the integrals of characteristic signals at 7.99 ppm, 7.95-7.81 ppm, 7.59-7.50 ppm, 7.44 ppm and 7.05-6.91 ppm respectively (Figure S13).

For  $c$ -(Azo<sub>2</sub>-TEG<sub>1</sub>),  $I_{c-azo}$  is the integrals of characteristic signals of *trans*-azo and *cis*-azo around from 8.19 ppm to 6.55 ppm, and  $I_{c-trans}$  is the integrals of characteristic signals of *trans*-azo of  $c$ -(Azo<sub>2</sub>-TEG<sub>1</sub>) at 8.07 ppm, 7.96-7.87 ppm, 7.56-7.50 ppm 7.47 ppm and 7.05-6.97 ppm respectively (Figure S13).

The calculation of  $F_{l-cis}$  and  $F_{c-cis}$  of  $l$ -(Azo<sub>n+1</sub>-TEG<sub>n</sub>) and  $c$ -(Azo<sub>n+1</sub>-TEG<sub>n</sub>) ( $n = 2-6$ ) is similar to the described method above. For  $l$ -(Azo<sub>n+1</sub>-TEG<sub>n</sub>),  $I_{l-azo}$  is the integrals of characteristic signals of *trans*-azo and *cis*-azo in the aromatic region around from 8.05 ppm to 6.57 ppm, and  $I_{l-tran}$  is the integrals of characteristic signals of *trans*-azo at 7.99 ppm, 7.96-7.80 ppm, 7.60-7.51 ppm, 7.44 ppm and 7.03-6.94 ppm respectively.

For  $l$ -(Azo<sub>n+1</sub>-TEG<sub>n</sub>),  $I_{c-azo}$  is the integrals of characteristic signals of *trans*-azo and *cis*-azo in the aromatic region around from 8.09 ppm to 6.57 ppm, and  $I_{c-trans}$  is the integrals of characteristic signals at 8.08-7.95 ppm, 7.94-7.78 ppm, 7.62-7.51 ppm, 7.45 ppm and 7.06-6.88 ppm respectively.

Using  $l$ -(Azo<sub>3</sub>-TEG<sub>2</sub>) and  $c$ -(Azo<sub>3</sub>-TEG<sub>2</sub>) as typical samples, <sup>1</sup>H NMR spectra are as follow (Figure S14).

Unlike the  $l$ -(Azo<sub>2</sub>-TEG<sub>1</sub>) and  $c$ -(Azo<sub>2</sub>-TEG<sub>1</sub>) above, the aromatic protons of  $l$ -(Azo<sub>3</sub>-TEG<sub>2</sub>) and  $c$ -(Azo<sub>3</sub>-TEG<sub>2</sub>) appeared weak signals at higher field (6.5-6.9 ppm), which meant that a small amount of azobenzene moieties were assigned to *cis*-configuration.



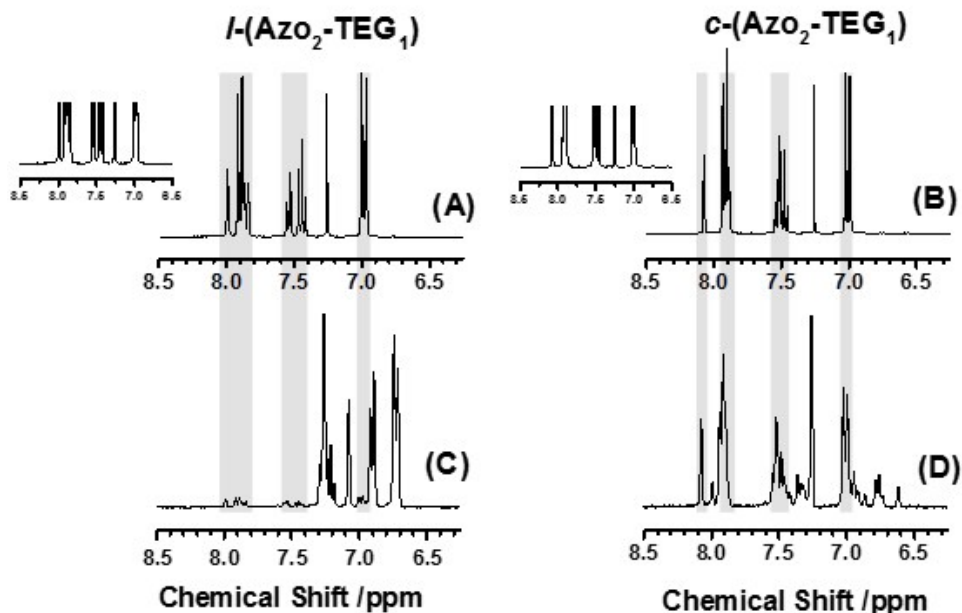

**Figure S13.**  $^1\text{H}$  NMR spectra in the aromatic region of  $l$ -( $\text{Azo}_2$ - $\text{TEG}_1$ ) and  $c$ -( $\text{Azo}_2$ - $\text{TEG}_1$ ) in  $\text{CDCl}_3$  at initial states (A), (B) and at the  $\text{PSS}_{\text{UV}}$  states (C), (D).

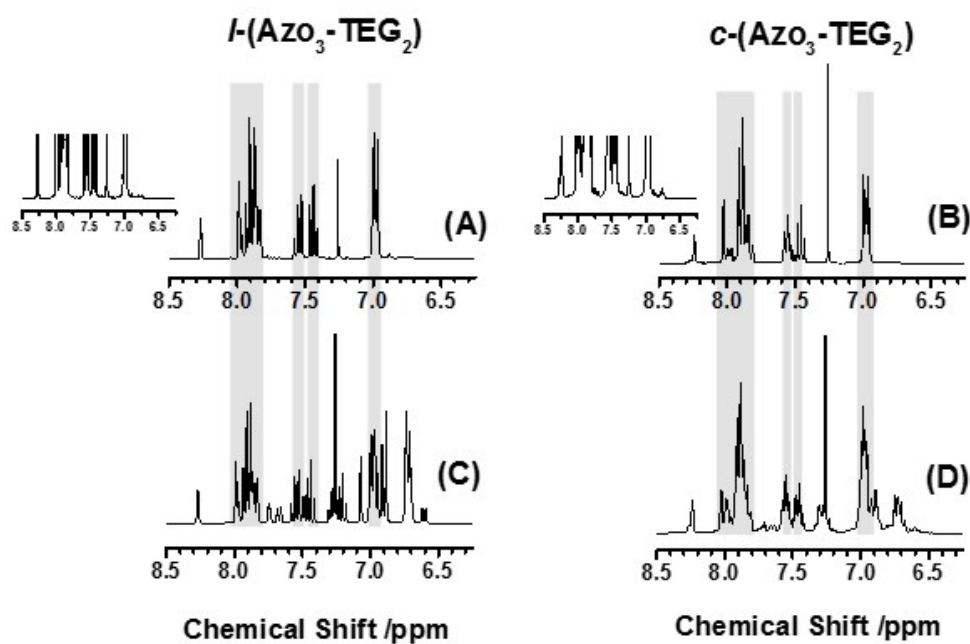

**Figure S14.**  $^1\text{H}$  NMR spectra in the aromatic region of  $l$ -( $\text{Azo}_3$ - $\text{TEG}_2$ ) and  $c$ -( $\text{Azo}_3$ - $\text{TEG}_2$ ) in  $\text{CDCl}_3$  at initial states (A), (B) and at the  $\text{PSS}_{\text{UV}}$  states (C), (D).

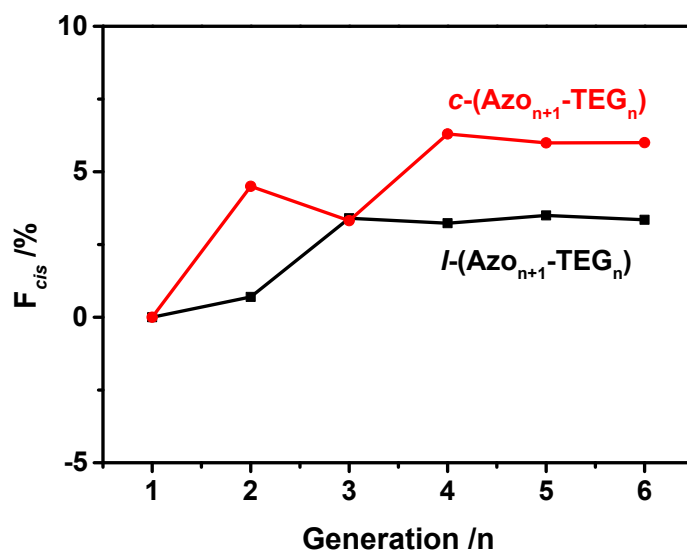

**Figure S15.** The evolution of *cis* isomers percentage estimated by NMR spectra with the generation ( $n$ ) of  $l-(Azo_{n+1}-TEG_n)$  and  $c-(Azo_{n+1}-TEG_n)$  ( $n=1-6$ ) in the initial states.

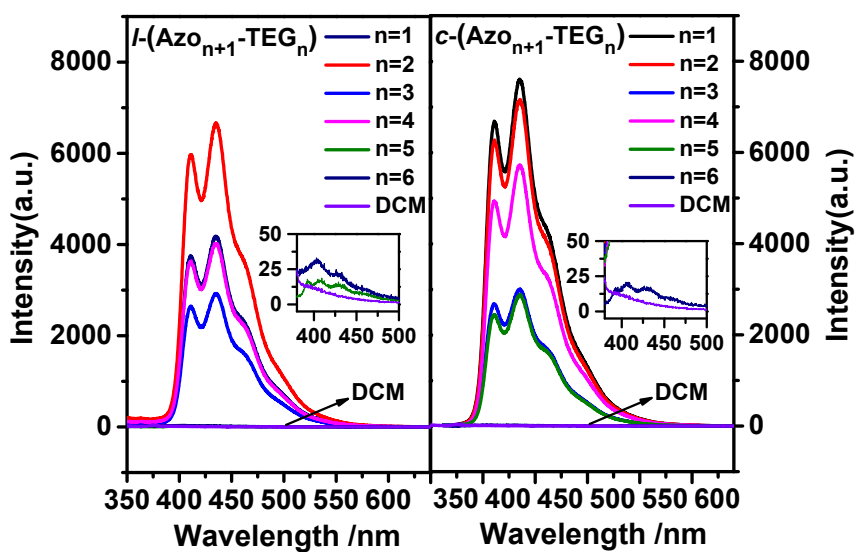

**Figure S16.** Fluorescence emission spectra (excitation wavelength at 350 nm) of  $l-(Azo_{n+1}-TEG_n)$  and  $c-(Azo_{n+1}-TEG_n)$  ( $n = 1-6$ ) in DCM at room temperature. The concentration of solution is  $3.6 \times 10^{-8}$  mol/mL of azobenzene units for both linear and cyclic oligomers.

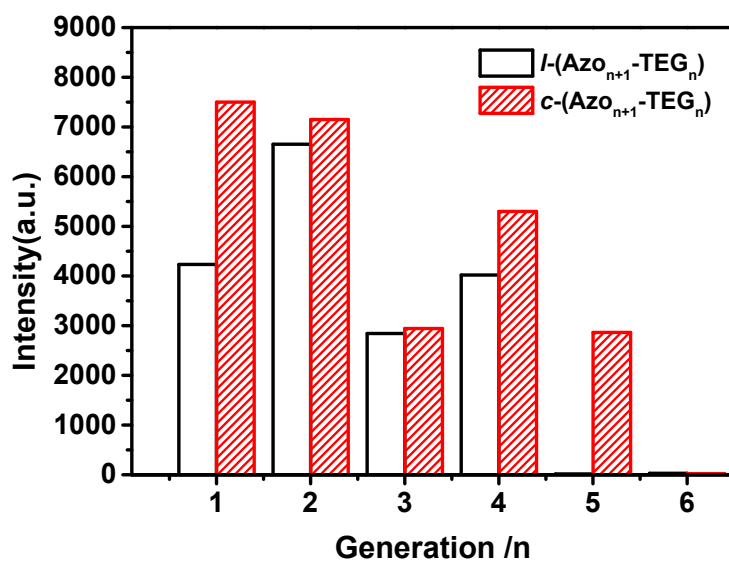

**Figure S17.** The evolution of fluorescence emission (excitation wavelength at 350 nm) of  $l$ -(Azo<sub>n+1</sub>-TEG<sub>n</sub>) and  $c$ -(Azo<sub>n+1</sub>-TEG<sub>n</sub>) ( $n=1-6$ ) with generation ( $n$ ) in DCM at room temperature.

## Additional Tables

**Table S1.** Data corresponding to mass peaks in MALDI-TOF mass spectra (Figure 4) and molecular weights ( $M_{n, \text{GPC}}$ ) determined by GPC of  $l$ -(Azo<sub>n+1</sub>-TEG<sub>n</sub>) and  $c$ -(Azo<sub>n+1</sub>-TEG<sub>n</sub>) (n = 1-6).

| Sample                                     | Theor.<br>[Da] | Obsed.<br>[ $m/z$ ] | $M_{n, \text{GPC}}$<br>[Da] |
|--------------------------------------------|----------------|---------------------|-----------------------------|
| $l$ -(Azo <sub>2</sub> -TEG <sub>1</sub> ) | 830.39         | 835.11              | 850                         |
| $c$ -(Azo <sub>2</sub> -TEG <sub>1</sub> ) | 828.37         | 850.52              | 420                         |
| $l$ -(Azo <sub>3</sub> -TEG <sub>2</sub> ) | 1481.72        | 1504.26             | 1900                        |
| $c$ -(Azo <sub>3</sub> -TEG <sub>2</sub> ) | 1479.70        | 1502.51             | 1300                        |
| $l$ -(Azo <sub>4</sub> -TEG <sub>3</sub> ) | 2133.04        | 2156.51             | 2700                        |
| $c$ -(Azo <sub>4</sub> -TEG <sub>3</sub> ) | 2131.03        | 2154.26             | 2100                        |
| $l$ -(Azo <sub>5</sub> -TEG <sub>4</sub> ) | 2784.37        | 2807.95             | 3600                        |
| $c$ -(Azo <sub>5</sub> -TEG <sub>4</sub> ) | 2782.35        | 2805.56             | 2800                        |
| $l$ -(Azo <sub>6</sub> -TEG <sub>5</sub> ) | 3435.70        | 3458.98             | 4800                        |
| $c$ -(Azo <sub>6</sub> -TEG <sub>5</sub> ) | 3433.68        | 3457.31             | 3500                        |
| $l$ -(Azo <sub>7</sub> -TEG <sub>6</sub> ) | 4087.03        | 4110.02             | 5900                        |
| $c$ -(Azo <sub>7</sub> -TEG <sub>6</sub> ) | 4085.01        | 4108.01             | 4300                        |

Theor. calculated molecular mass (Da);

Theor. ( $l$ -(Azo<sub>n+1</sub>-TEG<sub>n</sub>)) (Da) = 830.39+  $M_{\text{mon}}$  (651.33)  $\times$  (n-1)

Theor. ( $c$ -(Azo<sub>n+1</sub>-TEG<sub>n</sub>)) (Da) = 828.37+  $M_{\text{mon}}$  (651.33)  $\times$  (n-1)

Obsed. ( $l$ -(Azo<sub>n+1</sub>-TEG<sub>n</sub>) and  $c$ -(Azo<sub>n+1</sub>-TEG<sub>n</sub>)): molecular mass obtained from MALDI-TOF mass spectra ( $m/z$ );

Calcd. ( $l$ -(Azo<sub>n+1</sub>-TEG<sub>n</sub>)) (Da) = 830.39+  $M_{\text{mon}}$  (651.33)  $\times$  (n-1)+  $M_{\text{Na}}$  (22.99);

Calcd. ( $c$ -(Azo<sub>n+1</sub>-TEG<sub>n</sub>)) (Da) = 828.37+  $M_{\text{mon}}$  (651.33)  $\times$  (n-1)+  $M_{\text{Na}}$  (22.99);

$M_{\text{Na}}$  : the molecular mass of Na;

$M_{\text{mon}}$ : the molecular mass of monomer;

n : the number of repeat units of monomer;

**Table S2.** Data of photoresponsive behavior of the *l*-(Azo<sub>n+1</sub>-TEG<sub>n</sub>) and *c*-(Azo<sub>n+1</sub>-TEG<sub>n</sub>) (n = 1-6)

| Sample                                          | $\lambda_{\text{max}}$<br>(trans)<br>(nm) | $\lambda_{\text{max}}$<br>(cis)<br>(nm) | $k_{\text{e}}$<br>s <sup>-1</sup> | $k'_{\text{e}} / k_{\text{e}}$ | $k_{\text{H}}$<br>s <sup>-1</sup> | $k'_{\text{H}} / k_{\text{H}}$ |
|-------------------------------------------------|-------------------------------------------|-----------------------------------------|-----------------------------------|--------------------------------|-----------------------------------|--------------------------------|
| <i>l</i> -(Azo <sub>2</sub> -TEG <sub>1</sub> ) | 351.4                                     | 439.0                                   | 2.6                               | 1.61                           | 1.67                              | 1.01                           |
| <i>c</i> -(Azo <sub>2</sub> -TEG <sub>1</sub> ) | 338.5                                     | 439.0                                   | 4.2                               |                                | 1.68                              |                                |
| <i>l</i> -(Azo <sub>3</sub> -TEG <sub>2</sub> ) | 352.5                                     | 439.0                                   | 2.6                               | 1.07                           | 1.67                              | 1.12                           |
| <i>c</i> -(Azo <sub>3</sub> -TEG <sub>2</sub> ) | 343.0                                     | 439.0                                   | 3.0                               |                                | 1.87                              |                                |
| <i>l</i> -(Azo <sub>4</sub> -TEG <sub>3</sub> ) | 351.5                                     | 439.0                                   | 2.7                               | 1.21                           | 1.82                              | 1.05                           |
| <i>c</i> -(Azo <sub>4</sub> -TEG <sub>3</sub> ) | 341.3                                     | 439.0                                   | 3.3                               |                                | 1.91                              |                                |
| <i>l</i> -(Azo <sub>5</sub> -TEG <sub>4</sub> ) | 352.0                                     | 439.0                                   | 2.4                               | 1.41                           | 1.63                              | 1.20                           |
| <i>c</i> -(Azo <sub>5</sub> -TEG <sub>4</sub> ) | 342.2                                     | 439.0                                   | 3.4                               |                                | 1.96                              |                                |
| <i>l</i> -(Azo <sub>6</sub> -TEG <sub>5</sub> ) | 352.3                                     | 439.0                                   | 2.8                               | 1.23                           | 1.68                              | 1.14                           |
| <i>c</i> -(Azo <sub>6</sub> -TEG <sub>5</sub> ) | 350.6                                     | 439.0                                   | 3.5                               |                                | 1.88                              |                                |
| <i>l</i> -(Azo <sub>7</sub> -TEG <sub>6</sub> ) | 352.5                                     | 439.0                                   | 2.6                               | 1.15                           | 1.65                              | 1.07                           |
| <i>c</i> -(Azo <sub>7</sub> -TEG <sub>6</sub> ) | 351.3                                     | 439.0                                   | 3.1                               |                                | 1.77                              |                                |

The quantum yield was calculated using the following equation:

$$\Phi_s = \Phi_r [F_s A_r / F_r A_s] (n_r / n_s)^2$$

where  $\Phi_s$  is the fluorescence quantum yield of the sample,  $F$  is the area of the emission peak,  $n$  is the refractive index of solution, and  $A$  is the absorbance of the solution at the exciting wavelength. The subscripts  $r$  and  $s$  denote reference and sample, respectively.<sup>3</sup>

**Table S3.** The quantum yields ( $\Phi_s$ ) of the  $l$ -(Azo<sub>n+1</sub>-TEG<sub>n</sub>) and  $c$ -(Azo<sub>n+1</sub>-TEG<sub>n</sub>) ( $n = 1-6$ ).

| Sample                                     | $\Phi_s$<br>(10 <sup>-2</sup> ) | Sample                                     | $\Phi_s$<br>(10 <sup>-2</sup> ) |
|--------------------------------------------|---------------------------------|--------------------------------------------|---------------------------------|
| $l$ -(Azo <sub>2</sub> -TEG <sub>1</sub> ) | 0.984                           | $c$ -(Azo <sub>2</sub> -TEG <sub>1</sub> ) | 2.055                           |
| $l$ -(Azo <sub>3</sub> -TEG <sub>2</sub> ) | 1.695                           | $c$ -(Azo <sub>3</sub> -TEG <sub>2</sub> ) | 2.007                           |
| $l$ -(Azo <sub>4</sub> -TEG <sub>3</sub> ) | 0.805                           | $c$ -(Azo <sub>4</sub> -TEG <sub>3</sub> ) | 0.837                           |
| $l$ -(Azo <sub>5</sub> -TEG <sub>4</sub> ) | 0.848                           | $c$ -(Azo <sub>5</sub> -TEG <sub>4</sub> ) | 1.498                           |
| $l$ -(Azo <sub>6</sub> -TEG <sub>5</sub> ) | 0.004                           | $c$ -(Azo <sub>6</sub> -TEG <sub>5</sub> ) | 0.917                           |
| $l$ -(Azo <sub>7</sub> -TEG <sub>6</sub> ) | 0.009                           | $c$ -(Azo <sub>7</sub> -TEG <sub>6</sub> ) | 0.005                           |

## References

- 1 Frisch, M. J.; Trucks, G. W.; Schlegel, H. B.; Scuseria, G. E.; Robb, M. A.; Cheeseman, J. R.; Scalmani, G.; Barone, V.; Mennucci, B.; Petersson, G. A.; Nakatsuji, H.; Caricato, M.; Li, X.; Hratchian, H. P.; Izmaylov, A. F.; Bloino, J.; Zheng, G.; Sonnenberg, J. L.; Hada, M.; Ehara, M.; Toyota, K.; Fukuda, R.; Hasegawa, J.; Ishida, M.; Nakajima, T.; Honda, Y.; Kitao, O.; Nakai, H.; Vreven, T.; Montgomery, Jr., J. A.; Peralta, J. E.; Ogliaro, F.; Bearpark, M.; Heyd, J. J.; Brothers, E.; Kudin, K. N.; Staroverov, V. N.; Keith, T.; Kobayashi, R.; Normand, J.; Raghavachari, K.; Rendell, A.; Burant, J. C.; Iyengar, S. S.; Tomasi, J.; Cossi, M.; Rega, N.; Millam, J. M.; Klene, M.; Knox, J. E.; Cross, J. B.; Bakken, V.; Adamo,

- C.; Jaramillo, J.; Gomperts, R.; Stratmann, R. E.; Yazyev, O.; Austin, A. J.; Cammi, R.; Pomelli, C.; Ochterski, J. W.; Martin, R. L.; Morokuma, K.; Zakrzewski, V. G.; Voth, G. A.; Salvador, P.; Dannenberg, J. J.; Dapprich, S.; Daniels, A. D.; Farkas, O.; Foresman, J. B.; Ortiz, J. V.; Cioslowski, J.; Fox, D. J. Gaussian 09, revision C.01; Gaussian, Inc.: Wallingford, CT, 2010.
- 2 (a) R. Reuter, H. A. Wegner. *Chem.-Eur. J.*, 2011, **17**, 2987; (b) Y. Norikane, N. Tamaoki. *Eur. J. Org. Chem.*, 2006, 1296; (c) Y. Norikane, R. Katoh, N. Tamaoki. *Chem. Commun.*, 2008, 1898; (d) M. Han, M. Hara. *J. Am. Chem. Soc.*, 2005, **127**, 10951; (e) S. A. Nagamani, Y. Norikane, N. Tamaoki. *J. Org. Chem.*, 2005, **70**, 9304; (f) Y. Norikane, N. Tamaoki. *Org. Lett.*, 2004, **6**, 2595; (g) S. Rudolph-Böhner. M. Krüger, D. Oesterhelt, L. Moroder, T. Nägele, J. Wachtveitl. *J. Photochem. and Photobiol., A*. 1997, **150**, 235.
- 3 P. Smitha, S. K. Asha, *J. Phys. Chem. B.*, 2007, **111**, 6364.
